# Supplementary material for: Chemical switching behaviour of tricarbonylrhenium(i) complexes of a new redox active ‘Pincer’ ligand
Source: Royal Society of Chemistry journal article supplement (doi:10.1039/c001344g), 2010-01-01
Supplement: c001344g.pdf [file c001344g.pdf]

## Supporting Information for:

### Chemical Switching Behaviour of Tricarbonylrhenium(I) Complexes of a New Redox Active 'Pincer' Ligand.

Sarath Wanniarachchi,<sup>a</sup> Brendan J. Liddle<sup>a</sup> John Toussaint,<sup>a</sup> Sergey V. Lindeman,<sup>a</sup> Brian Bennett<sup>b</sup> and James R. Gardinier<sup>\*a</sup>

*Department of Chemistry, Marquette University, Milwaukee, WI 53201-1881.*

*<sup>b</sup>Department of Biophysics, Medical College of Wisconsin, Milwaukee, WI, USA 53226.*

#### Table of Contents:

|     |                                                                                                                |      |
|-----|----------------------------------------------------------------------------------------------------------------|------|
| [1] | <i>Experimental. General Considerations.</i>                                                                   | S-4  |
|     | Synthesis of HL.                                                                                               | S-5  |
|     | Synthesis of ReBr(CO) <sub>3</sub> [H(L)], <b>1</b> .                                                          | S-6  |
|     | Synthesis of {Re(CO) <sub>3</sub> [H(L)](PF <sub>6</sub> )}, <b>2·PF<sub>6</sub></b> .                         | S-7  |
|     | Synthesis of {Re(CO) <sub>3</sub> [H(L)](OSO <sub>2</sub> CF <sub>3</sub> )}, <b>2·OTf</b> .                   | S-7  |
|     | Synthesis of Re(CO) <sub>3</sub> L, <b>3</b> .                                                                 | S-8  |
|     | Acid-Base Cycling Experiments of Re(CO) <sub>3</sub> L, <b>3</b> .                                             | S-9  |
|     | Oxidation of Re(CO) <sub>3</sub> L, <b>3</b> .                                                                 | S-10 |
| [2] | <i>Crystallography. General Considerations.</i>                                                                | S-11 |
|     | <b>Table S-1.</b> Crystallographic Data Collection and Structure Refinement.                                   | S-13 |
|     | <b>Figure S-1.</b> Molecular Structures and Atom Labeling.                                                     | S-14 |
|     | <b>Table S-2.</b> Selected Bond Distances and Interatomic Angles.                                              | S-15 |
| [3] | <i>Spectroscopic and Electrochemical Characterization.</i>                                                     |      |
|     | <b>Figure S-3.</b> Overlay of IR spectra of <b>1-3</b> as KBr pellets and in CH <sub>2</sub> Cl <sub>2</sub> . | S-16 |
|     | <b>Figure S-4.</b> Cyclic Voltammograms of <b>1-3</b> and Scan Rate Dependence of <b>3</b> .                   | S-16 |

|                     |                                                                                                                                                |      |
|---------------------|------------------------------------------------------------------------------------------------------------------------------------------------|------|
| <b>Figure S-5.</b>  | Overlay of UV-Vis spectrum of <b>1</b> and <b>2</b> in CH <sub>2</sub> Cl <sub>2</sub> .                                                       | S-17 |
| <b>Figure S-6.</b>  | ESI(+) mass spectrum of <b>1</b> (CH <sub>3</sub> CN).                                                                                         | S-17 |
| <b>Figure S-7.</b>  | ESI(+) mass spectrum of <b>2</b> ·PF <sub>6</sub> (CH <sub>3</sub> CN).                                                                        | S-18 |
| <b>Figure S-8.</b>  | Direct Probe (EI) mass spectrum of <b>3</b> (CH <sub>3</sub> CN).                                                                              | S-18 |
| <b>Figure S-9.</b>  | <sup>1</sup> H NMR Spectrum (400 MHz) of <b>1</b> in CD <sub>2</sub> Cl <sub>2</sub> .                                                         | S-19 |
| <b>Figure S-10.</b> | DQCOSY NMR spectrum of <b>1</b> in CD <sub>2</sub> Cl <sub>2</sub> .                                                                           | S-19 |
| <b>Figure S-11.</b> | Variable Temp. <sup>1</sup> H NMR spectrum of <b>1</b> in CD <sub>2</sub> Cl <sub>2</sub> and in C <sub>2</sub> D <sub>2</sub> Cl <sub>4</sub> | S-20 |
| <b>Figure S-12.</b> | Plots of relative composition of species in solutions of <b>1</b><br>as a function of temperature                                              | S-21 |
| <b>Figure S-13.</b> | Variable Temp. <sup>1</sup> H NMR spectrum of <b>2</b> ·PF <sub>6</sub> and <b>2</b> ·OTf in CD <sub>2</sub> Cl <sub>2</sub> .                 | S-21 |
| <b>Figure S-14.</b> | Variable Temp. <sup>1</sup> H NMR spectrum of <b>3</b> in CD <sub>2</sub> Cl <sub>2</sub> .                                                    | S-22 |
| <b>Table S-3.</b>   | <sup>1</sup> H NMR Chemical Shift data assignments                                                                                             | S-22 |
|                     | Discussion of the NMR and other spectroscopic data for <b>1-3</b> .                                                                            | S-23 |
| <b>Scheme S-1.</b>  | Different low-energy (MMFF) geometric and coordination isomers<br>of ReBr(CO) <sub>3</sub> [H(L)].                                             | S-23 |
| <b>Figure S-15.</b> | Spectrophotometric Titration of <b>3</b> .                                                                                                     | S-25 |
| <b>[4]</b>          | <i>Computational Details.</i>                                                                                                                  | S-26 |
| <b>Figure S-16.</b> | Overlay of the Calculated and Experimental Structures of <b>3</b> and <b>3</b> <sup>+</sup> .                                                  | S-27 |
| <b>Table S-4.</b>   | Cartesian coordinates for BP86/6-31G* minimized structure of <b>1</b> .                                                                        | S-28 |
| <b>Table S-5.</b>   | Cartesian coordinates for BP86/6-31G* minimized structure of <b>2</b> <sup>+</sup> .                                                           | S-29 |
| <b>Table S-6.</b>   | Cartesian coordinates for BP86/6-31G* minimized structure of <b>3</b> .                                                                        | S-30 |
| <b>Table S-7.</b>   | Cartesian coordinates for BP86/6-31G* minimized structure of <b>3</b> <sup>+</sup> .                                                           | S-31 |
| <b>Table S-8.</b>   | Calculated SCF and Frontier Orbital Energies (eV) for <b>1</b> , <b>2</b> , <b>3</b> , and <b>3</b> <sup>+</sup> .                             | S-32 |
| <b>Figure S-17.</b> | Frontier Orbitals for <b>1</b> from DFT calculations (B3LYP/LACVP*).                                                                           | S-33 |

|                     |                                                                                                             |      |
|---------------------|-------------------------------------------------------------------------------------------------------------|------|
| <b>Figure S-18.</b> | Frontier Orbitals for <b>2</b> .                                                                            | S-34 |
| <b>Figure S-19.</b> | Frontier Orbitals for <b>3</b> .                                                                            | S-35 |
| <b>Figure S-20.</b> | Alpha-Spin Frontier Orbitals for <b>3<sup>+</sup></b> .                                                     | S-36 |
| <b>Figure S-21.</b> | Beta-Spin Frontier Orbitals for <b>3<sup>+</sup></b> .                                                      | S-37 |
| <b>Figure S-22.</b> | Simulated Electronic Absorption Spectra of <b>1</b> , <b>2</b> , <b>3</b> and <b>3<sup>+</sup></b> .        | S-38 |
|                     | TDDFT/TDA Excitation Energies and Allied Data for <b>1</b> , <b>2</b> , <b>3</b> and <b>3<sup>+</sup></b> . | S-39 |
| <b>[5]</b>          | <i>References.</i>                                                                                          | S-43 |

## Experimental Section

**General Considerations.** The compounds pyrazole, CuI, N,N'-dimethylethylenediamine (DMED), anhydrous K<sub>2</sub>CO<sub>3</sub> powder, Tl(X = PF<sub>6</sub> or OTf) and (NEt<sub>4</sub>)(OH) (1M in MeOH) were purchased from commercial sources and used without further purification while Re(CO)<sub>5</sub>Br,<sup>S1</sup> di(2-bromo-4-tolyl)amine,<sup>S2</sup> were prepared by literature methods. The solvents used in the preparations were dried by conventional methods and distilled prior to use. Midwest MicroLab, LLC, Indianapolis, Indiana 45250, performed all elemental analyses. IR spectra were recorded in the 4000-500 cm<sup>-1</sup> region (as KBr pellets or as CH<sub>2</sub>Cl<sub>2</sub> solutions in a cell with KBr windows) on a Nicolet Magna-IR 560 spectrometer. <sup>1</sup>H and <sup>13</sup>C NMR spectra were recorded on a Varian 400 MHz spectrometer. Chemical shifts were referenced to solvent resonances at  $\delta_H$  7.27,  $\delta_C$  77.23 for CDCl<sub>3</sub>;  $\delta_H$  5.33,  $\delta_C$  54.00 for CDCl<sub>3</sub>;  $\delta_H$  1.94,  $\delta_C$  118.9 for CD<sub>3</sub>CN and  $\delta_H$  2.05,  $\delta_C$  29.92 for acetone-d<sub>6</sub>. Melting point determinations were made on samples contained in glass capillaries using an Electrothermal 9100 apparatus and are uncorrected. Absorption measurements were recorded on an Agilent 8453 spectrometer. Electrochemical measurements were collected under nitrogen atmosphere at a scan rate of 100 mV/s for samples as 0.1 mM CH<sub>2</sub>Cl<sub>2</sub> solutions with 0.1 M NBu<sub>4</sub>PF<sub>6</sub> as the supporting electrolyte. A three-electrode cell comprised of an Ag/AgCl electrode (separated from the reaction medium with a semipermeable polymer membrane filter), a platinum working electrode, and a glassy carbon counter electrode was used for the voltammetric measurements. With this set up, the ferrocene/ferrocenium couple had an E<sub>1/2</sub> value of +0.53 V consistent with the literature value in this solvent.<sup>S3</sup> Mass spectrometric measurements recorded in ESI(+) or ESI(-) mode were obtained on a Micromass Q-TOF spectrometer whereas that performed by using direct-probe analyses were made on a VG 70S instrument. For the ESI(+) experiments, formic acid (approximately 0.1 % v/v) was added

to the mobile phase (CH<sub>3</sub>CN). EPR measurements were obtained using a Bruker ELEXSYS E600 equipped with an ER4116DM cavity resonating at 9.63 GHz, an Oxford Instruments ITC503 temperature controller and ESR-900 helium-flow cryostat. The ESR spectra were recorded with 100kHz field modulation.

### Syntheses.

**Di(2-(pyrazolyl)-4-tolyl)amine, H(L).** A mixture of 10.82 g (0.030 mol) di(2-bromo-p-tolyl)amine, 7.25 g (0.107mol, 3.5 equiv) pyrazole, 14.72 g (0.107mmol, 3.5 equiv) K<sub>2</sub>CO<sub>3</sub>, 1.2 mL (0.012 mol, 40 mol %) DMED, and 10 mL of distilled xylenes was purged with nitrogen 15 min. Then, 0.58 g (3 mmol, 10 mol %) CuI was added as a solid under nitrogen and the mixture was heated at reflux for 36 h under nitrogen. After cooling to room temperature, 200 mL of H<sub>2</sub>O was added and the mixture was extracted with three 100 mL portions of CH<sub>2</sub>Cl<sub>2</sub>. The combined organic layers were dried over MgSO<sub>4</sub>, filtered, and solvent was removed by rotary evaporation to give an oily residue that was purified by column chromatography on silica gel. Elution using 10:1 hexanes:ethyl acetate (R<sub>f</sub> = 0.5) afforded 6.90 g (69 %) of **H(L)** as a white powder, after removing solvent and drying under vacuum. Mp, 89 - 90 °C. Anal. Calcd (obs.) for C<sub>20</sub>H<sub>19</sub>N<sub>5</sub>: C, 72.93 (73.05); H, 5.81 (5.97); N, 21.26 (20.88). <sup>1</sup>H NMR: (CD<sub>2</sub>Cl<sub>2</sub>) 8.48 (s, 1H, NH), 7.72 (dd, *J* = 2, 0.6 Hz, 2H, H<sub>3</sub>pz), 7.67 (dd, *J* = 2, 0.6 Hz, 2H, H<sub>5</sub>pz), 7.25 (d, *J* = 8 Hz, 2H, Ar), 7.12 (s, 2H, Ar), 7.03 (d, *J* = 8 Hz, 2H, Ar), 6.43(dd, *J* = 2, 0.6 Hz, 2H, H<sub>4</sub>pz), 2.30 (s, 6H, ArCH<sub>3</sub>). <sup>1</sup>H NMR (acetone-d<sub>6</sub>) : 8.72 (s, 1H, NH), 7.94 (dd, *J* = 2, 0.6 Hz, 2H, H<sub>3</sub>pz), 7.81 (dd, *J* = 2, 0.6 Hz, 2H, H<sub>5</sub>pz), 7.36 (d, *J* = 8 Hz, 2H, Ar), 7.29 (d, *J* = 2 Hz, 2H, Ar), 7.19 (dd, *J* = 8, 2 Hz, 2H, Ar), 6.57 (dd, *J* = 2, 0.6 Hz, 2H, H<sub>4</sub>pz), 2.41 (s, 6H, ArCH<sub>3</sub>). <sup>13</sup>C NMR: (CDCl<sub>3</sub>) 140.5, 134.7, 130.7, 130.2, 130.1, 129.0, 125.8, 118.9, 106.7, 20.6. UV-VIS λ<sub>max</sub>, nm (ε, M<sup>-1</sup>cm<sup>-1</sup>), CH<sub>2</sub>Cl<sub>2</sub>: 238 (31,600), 303 (22,700). LRMS (Direct Probe) m/z (Int.) [assign.]: 329 (100) [HL]<sup>+</sup>, 262 (8)

[HL–Hpz]<sup>+</sup>, 173 (15) [H<sub>2</sub>L–pztolyl]<sup>+</sup>. Single crystals suitable for X-ray diffraction were obtained by slow cooling a hot hexanes solution (supersaturated) to room temperature over the course of a few hours.

***fac*-ReBr(CO)<sub>3</sub>[H(L)], 1.** A mixture of 0.510 g (1.27 mmol) Re(CO)<sub>5</sub>Br and 0.455g (1.38 mmol) of **H(L)** in 20 mL toluene was heated at reflux 15 h. The resulting precipitate was isolated by filtration, washed with two 5 mL portions Et<sub>2</sub>O and dried under vacuum which afforded 0.71 g (83 %) of **1** as a colorless solid. Mp. 272 - 274°C dec. Anal. Calcd (obs.) for C<sub>23</sub>H<sub>19</sub>BrN<sub>5</sub>O<sub>3</sub>Re: C, 40.65 (40.33); H, 2.82 (2.67); N, 10.31 (10.02). IR (KBr) ν<sub>co</sub> 2020, 1920, 1880 cm<sup>-1</sup>. IR (CH<sub>2</sub>Cl<sub>2</sub>) ν<sub>co</sub> major bands; 2029, 1919, 1896, minor bands; 2038, 1930 cm<sup>-1</sup>. <sup>1</sup>H NMR: (CD<sub>2</sub>Cl<sub>2</sub>, 293K): (three species, see text: **I**, 48% of signal integration intensity from well-resolved resonances in the ArCH<sub>3</sub>, NH, and H<sub>4</sub>pz regions of the spectrum; **II**, 42% of signal; **III** 10 % of signal): 11.92 (s, 1H, NH, **II**), 11.40 (s, 1H, NH, **III**), 9.89 (s, 1H, NH, **I**), 8.22 (d, *J* = 3 Hz, 1H, H<sub>5</sub>pz, **III**), 8.18 (d, *J* = 3 Hz, 1H, H<sub>5</sub>pz, **I**), 8.17 (d, *J* = 2 Hz, 1H, H<sub>3</sub>pz, **I**), 8.13 (d, *J* = 2 Hz, 1H, H<sub>3</sub>pz, **III**), 8.01 (d, *J* = 3 Hz, 1H, H<sub>5</sub>pz, **III**), 7.92 (d, *J* = 2 Hz, 2H, H<sub>3</sub>pz, **II**), 7.91 (d, *J* = 3 Hz, 3H, H<sub>5</sub>pz, **I** and **II**), 7.90 (d, *J* = 2 Hz, 1H, H<sub>3</sub>pz, **III**), 7.88 (d, *J* = 3 Hz, 1H, H<sub>5</sub>pz, **I**), 7.59-7.54 (m, Ar, 2H, **I/II/III**), 7.48 (s, 1H, Ar, **III**), 7.36-7.31 (m, Ar, 3H, **I/II/III** and H<sub>5</sub>pz, **I**), 7.30 (s, 1H, Ar, **III**), 7.23-7.08 (m, 2.5H, Ar **I/II/ III**), 6.86 (d, *J* = 8 Hz, 1H, Ar, **III**), 6.77 (dd, *J* = 3, 2 Hz, 1H, H<sub>4</sub>pz, **I**), 6.76 (dd, *J* = 3, 2 Hz, 1H, H<sub>4</sub>pz, **III**), 6.61 (dd, *J* = 3, 2 Hz, 1H, H<sub>4</sub>pz, **III**), 6.51 (dd, *J* = 3, 2 Hz, 2H, H<sub>4</sub>pz, **II**), 6.41 (dd, *J* = 3, 2 Hz, 1H, H<sub>4</sub>pz, **I**), 5.94 (d, *J* = 8 Hz, 1H, Ar, **III**), 2.51 (s, 3H, ArCH<sub>3</sub>, **III**), 2.47 (s, 3H, ArCH<sub>3</sub>, **I**), 2.44 (s, 3H, ArCH<sub>3</sub>, **I**), 2.37 (s, 6H, ArCH<sub>3</sub>, **II**), 2.32 (s, 3H, ArCH<sub>3</sub>, **III**). <sup>13</sup>C NMR: (CD<sub>2</sub>Cl<sub>2</sub>, 293K) major asymmetric species **I**: 148.00, 141.34, 139.05, 137.68, 135.23, 133.52, 132.09, 128.34, 124.69, 122.81, 119.92, 110.5, 108.37, 21.31, 20.93; symmetric species **II**: 148.85, 139.13, 136.45, 132.97, 130.57, 124.78,

124.24, 110.06, 20.98; minor asymmetric species **III**: 148.89, 142.41, 140.10, 136.93, 136.76, 135.07, 134.99, 131.72, 131.27, 131.06, 130.27, 128.39, 124.74, 124.15, 122.87, 110.53, 108.40, 21.26, 20.91. UV-VIS  $\lambda_{\text{max}}$ , nm ( $\epsilon$ ,  $\text{M}^{-1}\text{cm}^{-1}$ ),  $\text{CD}_2\text{Cl}_2$ : 230 (49,300), 251 (32,300), 287 (11,100). LRMS ESI(+) m/z (Int.) [assign.]: 743 (4)  $[\text{ReBr}(\text{CO})_3(\text{HL})+\text{Na}(\text{CH}_3\text{CN})]^+$ , 721 (6)  $[\text{ReBr}(\text{CO})_3(\text{H}_2\text{L})+\text{CH}_3\text{CN}]^+$ , 718 (7)  $[\text{ReBr}(\text{CO})_3(\text{HL})+\text{K}]^+$ , 702 (5)  $[\text{ReBr}(\text{CO})_3(\text{HL})+\text{Na}]^+$ , 641 (1)  $[\text{Re}(\text{CO})_3(\text{H}_2\text{L})+\text{CH}_3\text{CN}]^+$ , 600 (100)  $[\text{Re}(\text{CO})_3(\text{HL})]^+$ , 330 (31)  $[\text{H}_2\text{L}]^+$ . X-ray quality crystals were grown by layering an acetone solution with hexane and allowing the solvents to slowly diffuse over two days.

**$\{\text{Re}(\text{CO})_3[\text{H}(\text{L})]\}(\text{PF}_6)$ , **2**·**PF<sub>6</sub>**.** A mixture of 0.208 g (0.306 mmol) of **1** and 0.107 g (0.306 mmol)  $\text{TiPF}_6$  in 20 mL dry  $\text{CH}_3\text{CN}$  was heated at reflux for 15 h. After cooling to room temperature,  $\text{TiBr}$  was removed by filtration through Celite, and solvent was removed from the filtrate by rotary evaporation. The residue was washed with two 5 mL portions of  $\text{Et}_2\text{O}$  and was dried under vacuum to give 0.184 g (80 %) of **2**·**PF<sub>6</sub>** as a white powder. Mp, 255 – 258 °C dec. Anal. Calcd (obs.) for  $\text{C}_{23}\text{H}_{19}\text{F}_6\text{N}_5\text{O}_3\text{PRE}$ : C, 37.10 (36.99); H, 2.57 (2.32); N, 9.41 (9.16). IR (KBr)  $\nu_{\text{co}}$  2040, 1950, 1930  $\text{cm}^{-1}$ .  $^1\text{H}$  NMR: ( $\text{CD}_2\text{Cl}_2$ , 293K) 7.95 (d,  $J = 2$  Hz, 2H,  $\text{H}_{3\text{pz}}$ ), 7.91 (d,  $J = 3$  Hz, 2H,  $\text{H}_{5\text{pz}}$ ), 7.74 (s, 1H, NH), 7.24-7.16 (m, 4H, Ar), 6.58 (dd,  $J = 3, 2$  Hz, 2H,  $\text{H}_{4\text{pz}}$ ), 2.41 (s, 6H,  $\text{ArCH}_3$ ).  $^{13}\text{C}$  NMR: suitable spectrum of a concentrated solution could not be obtained even after 24 hours acquisition time. UV-VIS  $\lambda_{\text{max}}$ , nm ( $\epsilon$ ,  $\text{M}^{-1}\text{cm}^{-1}$ ),  $\text{CD}_2\text{Cl}_2$ : 230 (42,500), 245 (34,800), 367 (1,750). LRMS ESI(+) m/z (Int.) [assign.]: 600 (100)  $[(\text{HL})\text{Re}(\text{CO})_3]^+$ . X-ray quality crystals were grown by layering a dichloromethane solution with hexane and allowing the solvents to slowly diffuse over two days.

**$\{\text{Re}(\text{CO})_3[\text{H}(\text{L})]\}(\text{OTf})$ , **2**·**OTf**.** A mixture of 0.175 g (0.258 mmol) of **1** and 0.091 g (0.26 mmol)  $\text{TiOTf}$  in 20 mL dry  $\text{CH}_3\text{CN}$  was heated at reflux for 15 h. After cooling to room

temperature, TlBr was removed by filtration through Celite, and solvent was removed from the filtrate by rotary evaporation. The residue was washed with two 5 mL portions of Et<sub>2</sub>O and was dried under vacuum to give 0.173 g (90 % based on **1**) of **2·OTf** as a white powder. Mp, 275 - 277°C dec. Anal. Calcd (obs.) for C<sub>24</sub>H<sub>19</sub>F<sub>3</sub>N<sub>5</sub>O<sub>6</sub>ReS: C, 38.50 (38.78); H, 2.56 (2.72); N, 9.35 (8.99). IR (CH<sub>2</sub>Cl<sub>2</sub>)  $\nu_{\text{co}}$  2040, 1938, 1922 cm<sup>-1</sup>. IR (KBr)  $\nu_{\text{co}}$  2036, 1947, 1922 cm<sup>-1</sup>. <sup>1</sup>H NMR: (CD<sub>2</sub>Cl<sub>2</sub>, 293K) 9.79 (s, 1H, NH), 7.93 (d, *J* = 2 Hz, 2H, H<sub>3pz</sub>), 7.89 (d, *J* = 3 Hz, 2H, H<sub>5pz</sub>), 7.25-7.15 (m, 6H, Ar), 6.55 (dd, *J* = 3, 2 Hz, 2H, H<sub>4pz</sub>), 2.39 (s, 6H, ArCH<sub>3</sub>). <sup>13</sup>C NMR: (CD<sub>2</sub>Cl<sub>2</sub>, 293K) 193.5, 191.3, 148.1, 139.5, 135.9, 133.2, 132.2, 130.7, 125.0, 123.9, 110.1, 21.0. UV-VIS  $\lambda_{\text{max}}$ , nm ( $\epsilon$ , M<sup>-1</sup>cm<sup>-1</sup>), CD<sub>2</sub>Cl<sub>2</sub>: 230 (43,000), 245 (34,000), 367 (1,700). LRMS ESI(+) *m/z* (Int.) [assign.]: 600 (100) [(HL)Re(CO)<sub>3</sub>]<sup>+</sup>. X-ray quality crystals were grown by layering a dichloromethane solution with hexane and allowing the solvents to slowly diffuse over two days.

**Re(CO)<sub>3</sub>(L), 3.** To a solution of 0.105 g (0.15mmol) **1** in 20 mL of CH<sub>3</sub>CN was added 1.50 mL of a 0.103 M (NEt<sub>4</sub>)(OH) solution in MeOH (0.155 mmol), immediately giving a yellow solution. The mixture was stirred for 15 min then solvent was removed by rotary evaporation. The residue was washed with two 5 mL portions Et<sub>2</sub>O, and the yellow product was extracted with three 10 mL portions of benzene. Benzene was removed by vacuum distillation to afford 0.060 g (67 %) of **3** as a yellow powder. Mp. 295-298°C dec. Anal. Calcd (obs.) for C<sub>23</sub>H<sub>18</sub>N<sub>5</sub>O<sub>3</sub>Re: C, 46.15 (45.89); H, 3.03 (3.11); N, 11.70 (11.58). IR (CH<sub>2</sub>Cl<sub>2</sub>)  $\nu_{\text{co}}$  2015, 1905, 1885 cm<sup>-1</sup>. IR (KBr)  $\nu_{\text{co}}$  2013, 1901, 1876 cm<sup>-1</sup>. <sup>1</sup>H NMR: (CD<sub>2</sub>Cl<sub>2</sub>, 293 K) 7.95 (d, *J* = 2 Hz, 2H, H<sub>3pz</sub>), 7.92 (d, *J* = 3 Hz, 2H, H<sub>5pz</sub>), 7.82 (part of AA'BB', 2H, Ar), 7.12 (part of AA'BB', 2H, Ar), 7.11 (s, 2H, Ar), 6.52 (dd, *J* = 3, 2 Hz, 2H, H<sub>4pz</sub>), 2.36 (s, 6H, ArCH<sub>3</sub>). <sup>1</sup>H NMR: (acetone-d<sub>6</sub>) 8.35 (dd, *J* = 2, 1 Hz, 2H, H<sub>3pz</sub>), 8.30 (dd, *J* = 2, 1 Hz, 2H, H<sub>5pz</sub>), 7.84 (part of AB d, *J* = 8 Hz, 2H), 7.29 (d, *J* = 2, Hz, 2H, Ar), 7.11 (part of AB d, *J* = 9, 2 Hz, 2H, Ar), 6.65 (dd, *J*

= 2, 1 Hz, 2H, H<sub>4</sub>pz), 2.31 (s, 6H, ArCH<sub>3</sub>). <sup>13</sup>C NMR: (CD<sub>2</sub>Cl<sub>2</sub>) 196.8, 146.6, 142.9, 130.9, 130.3, 129.0, 128.0, 123.9, 119.4, 108.0, 20.7. HRMS [Direct Probe, m/z] Calc. (Obs) for C<sub>23</sub>H<sub>18</sub>N<sub>5</sub>O<sub>3</sub>Re: 599.0968 (599.0973). LRMS (Direct Probe) m/z (Int.) [assign.]: 599 (30) [LRe(CO)<sub>3</sub>]<sup>+</sup>, 515 (58) [LRe – 3 CO + H]<sup>+</sup>, 329 (28) [H<sub>2</sub>L]<sup>+</sup>, 173 (100) [H<sub>2</sub>L–pztolyl]<sup>+</sup>, 105 (47) [H<sub>2</sub>Ntolyl]<sup>+</sup>. UV-VIS λ<sub>max</sub>, nm (ε, M<sup>-1</sup>cm<sup>-1</sup>), CD<sub>2</sub>Cl<sub>2</sub>: 229 (40,200), 239 (37,900), 309 (10,600), 353 (8,500), 390 (6,400). X-ray quality crystals were grown by layering an acetone solution with hexane and allowing the solvents to slowly diffuse over two days.

### Acid/base cycling experiments.

*UV-Vis spectroscopic experiments.* In a typical UV-Vis spectroscopic acid/base cycling experiment, 10 μL aliquots of 1.904 mM acid (HBF<sub>4</sub> or CF<sub>3</sub>COOH) in CH<sub>2</sub>Cl<sub>2</sub> solution were sequentially added to 3.0 mL of a 0.0635 mM ReLCO<sub>3</sub> solution in CH<sub>2</sub>Cl<sub>2</sub> where the disappearance of the band at 450 nm was monitored. After one equivalent of acid was added, 10 μL aliquots of 1.904 mM (NEt<sub>4</sub>)(OH) solution in dichloromethane were added to the resultant solution. This acid/base cycle was repeated three more times.

*Electrochemical experiments.* In a representative acid/base cycling experiment monitored by cyclic voltammetry, a solution of 0.0100 g (0.0167 mmol) of Re(CO)<sub>3</sub>(L) (**3**) and 0.300 g (1.23 mmol) NBu<sub>4</sub>PF<sub>6</sub> in 15 mL dry CH<sub>2</sub>Cl<sub>2</sub> was treated with 10 μL aliquots of 0.1670 M tetrafluoroboric acid in CH<sub>2</sub>Cl<sub>2</sub> where the cyclic voltammogram was recorded between 0.0 to +1.0 V versus Ag/AgCl (the potential values in the main text were calibrated to an external Fc/Fc<sup>+</sup> couple +0.53 V versus Ag/AgCl in CH<sub>2</sub>Cl<sub>2</sub>) at a scan rate of 100 mV/s after each addition. After the wave centered near +0.53 V versus Ag/AgCl, indicative of **3**, approached a constant near zero baseline current value (after approximately one equivalent of acid added), 10

$\mu\text{L}$  aliquots of 0.1670 M  $(\text{NEt}_4)(\text{OH})$  in  $\text{CH}_2\text{Cl}_2$  were added. The voltammograms recorded after each successive base addition, as above. This acid/base cycling process was repeated three more times.

### Chemical Oxidation of **3**.

*Spectrophotometric Titrations.* Standard solutions the cation radical 9,10-dimethoxyoctahydro-1,4:5,8-dimethanoanthracenium hexachloroantimonate,  $(\text{CRET}^+)(\text{SbCl}_6^-)$ ,<sup>S4</sup> were prepared by dissolving the cation radical in freshly distilled  $\text{CH}_2\text{Cl}_2$  and diluting until the absorbance measured at 517 nm was about 1.0, corresponding to a concentration of  $1.37 \times 10^{-4}$  M ( $\epsilon$  7,300). For the titrations, 3 mL of this standard solution were used and the spectrum was acquired before and after the addition 10  $\mu\text{L}$  aliquots of 0.00548 M solutions of **3**.

*Synthetic Scale.* A solution of 0.054g (89  $\mu\text{mol}$ ) of  $(\text{CRET}^+)(\text{SbCl}_6^-)$  in 15 mL dry, distilled  $\text{CH}_2\text{Cl}_2$  and the resultant solution was transferred under nitrogen by cannula to a magnetically stirred solution of 0.053 g (89  $\mu\text{mol}$ ) **3** in 15 mL  $\text{CH}_2\text{Cl}_2$ . The resultant royal blue solution was stirred 10 min and solvent was removed under vacuum. The blue solid was washed with two 5 mL portions of pentane and then dried under vacuum to give 0.053 g (64 %) of  $(\text{3}^+)(\text{SbCl}_6^-)$  as a blue solid.

Alternatively, a solution of 0.115 g (0.448 mmol)  $\text{AgOTf}$  in 10 mL  $\text{CH}_2\text{Cl}_2$  was added to a solution of 0.268 g (0.447 mmol) **3** in 10 mL  $\text{CH}_2\text{Cl}_2$ . After the resulting blue-black mixture had been stirred 1 h, the blue solution was separated from silver metal by filtration. Solvent was removed by vacuum distillation and the blue residue was washed with two 5 mL portions of hexane to leave 0.244 g (73% based on Re) of  $(\text{3}^+)(\text{OTf}^-)$  as a blue solid. IR ( $\text{CH}_2\text{Cl}_2$ )  $\nu_{\text{co}}$  2035,

1932, 1925  $\text{cm}^{-1}$ . IR (KBr)  $\nu_{\text{co}}$  2031, 1941  $\text{cm}^{-1}$ . UV-VIS  $\lambda_{\text{max}}$ , nm ( $\epsilon$ ,  $\text{M}^{-1}\text{cm}^{-1}$ ),  $\text{CD}_2\text{Cl}_2$ : 488 (1,000), 618 (2,680), 748 (3,600), 892sh (900), 1046sh (460).

### Crystallography.

X-ray intensity data from a colorless block of **H(L)**, a colorless plate of  $\text{ReBr}(\text{CO})_3[\text{H(L)}]$  (**1**), a colorless prism of  $\{\text{Re}(\text{CO})_3[\text{H(L)}]\}(\text{PF}_6)$ , (**2**·**PF<sub>6</sub>**), a colorless prism of  $\{\text{Re}(\text{CO})_3[\text{H(L)}]\}(\text{OTf})$ , (**2**·**OTf**), and a yellow block of  $\text{Re}(\text{CO})_3(\text{L})$ , (**3**) were measured at 100(2) K with a Bruker AXS 3-circle diffractometer equipped with a SMART2<sup>S5</sup> CCD detector using  $\text{Cu}(\text{K}\alpha)$  radiation. Raw data frame integration and Lp corrections were performed with SAINT+.<sup>S6</sup> Final unit cell parameters were determined by least-squares refinement of 7538, 6621, 8198, 9905, and 7176 reflections from the data sets of **H(L)**, **1**, **2**·**PF<sub>6</sub>**, **2**·**OTf**, and **3**, respectively, with  $I > 2\sigma(I)$  for each. Analysis of the data showed negligible crystal decay during collection in each case. Direct methods structure solutions, difference Fourier calculations and full-matrix least-squares refinements against  $F^2$  were performed with SHELXTL.<sup>S7</sup> Semi-empirical absorption correction based on the multiple measurement of equivalent reflections was applied to the data of **H(L)** with SADABS.<sup>S6</sup> An empirical absorption correction of area-detector data for twinned (2:1 component ratio separated by ca 2 degree split) crystals and of **1** was applied with TWINABS.<sup>S6</sup> Numerical absorption corrections based on the real shape of the crystals for the remainder of the compounds were applied with SADABS.<sup>S6</sup> All non-hydrogen atoms were refined with anisotropic displacement parameters with the following exception. Two alternative positions of  $\text{PF}_6^-$  anion were found in **2**·**PF<sub>6</sub>** from a series of difference Fourier syntheses and were refined with soft geometric restraints (using the SAME instruction in SHELXL). Their relative population was refined to 27/73. The fluorines of the minor disorder component were refined isotropically. The secondary amino nitrogens in **H(L)** and in **2**·**X** (**X** =

PF<sub>6</sub>, OTf) were located and refined whereas the remaining hydrogen atoms in all complexes were placed in geometrically idealized positions and included as riding atoms. The X-ray crystallographic parameters and further details of data collection and structure refinements are presented in Table S-1. Selected bond distances and interatomic angles are found in Table S-2 while the remaining distances and angles can be found in the cif files deposited with the CSD.<sup>S8</sup>

**Table S-1.** Crystallographic Data and Refinement Parameters for **H(L)**, **ReBr(CO)<sub>3</sub>[H(L)]** (**1**), **{Re(CO)<sub>3</sub>[H(L)]}(X)** (**X** = **PF<sub>6</sub>**, **2·PF<sub>6</sub>**; **X** = **OTf**, **2·OTf**), and **Re(CO)<sub>3</sub>(L)**, (**3**).

| Compound                                                                                                                                                                                                                            | <b>H(L)</b>                                    | <b>1</b>                                                           | <b>2·PF<sub>6</sub></b>                                                          | <b>2·OTf</b>                                                                     | <b>3</b>                                                         |
|-------------------------------------------------------------------------------------------------------------------------------------------------------------------------------------------------------------------------------------|------------------------------------------------|--------------------------------------------------------------------|----------------------------------------------------------------------------------|----------------------------------------------------------------------------------|------------------------------------------------------------------|
| Formula                                                                                                                                                                                                                             | C <sub>20</sub> H <sub>19</sub> N <sub>5</sub> | C <sub>23</sub> H <sub>19</sub> BrN <sub>5</sub> O <sub>3</sub> Re | C <sub>23</sub> H <sub>19</sub> F <sub>6</sub> N <sub>5</sub> O <sub>3</sub> Pre | C <sub>24</sub> H <sub>19</sub> F <sub>3</sub> N <sub>5</sub> O <sub>6</sub> ReS | C <sub>23</sub> H <sub>18</sub> N <sub>5</sub> O <sub>3</sub> Re |
| Formula weight                                                                                                                                                                                                                      | 329.40                                         | 679.54                                                             | 744.60                                                                           | 748.70                                                                           | 598.62                                                           |
| Crystal system                                                                                                                                                                                                                      | Monoclinic                                     | Monoclinic                                                         | Monoclinic                                                                       | Monoclinic                                                                       | Monoclinic                                                       |
| Space Group                                                                                                                                                                                                                         | P n                                            | P 2 <sub>1</sub> /c                                                | P 2 <sub>1</sub> /c                                                              | P 2 <sub>1</sub> /n                                                              | C 2/c                                                            |
| a, Å                                                                                                                                                                                                                                | 7.3364(2)                                      | 8.1846(4)                                                          | 15.6722(7)                                                                       | 8.1784(2)                                                                        | 24.5632(5)                                                       |
| b, Å                                                                                                                                                                                                                                | 16.5933(4)                                     | 31.9302(14)                                                        | 9.6375(4)                                                                        | 18.4766(4)                                                                       | 11.8412(3)                                                       |
| c, Å                                                                                                                                                                                                                                | 14.1016(3)                                     | 8.9168(5)                                                          | 16.8562(7)                                                                       | 17.1772(4)                                                                       | 15.4073(3)                                                       |
| α, deg                                                                                                                                                                                                                              | 90                                             | 90                                                                 | 90                                                                               | 90                                                                               | 90                                                               |
| β, deg                                                                                                                                                                                                                              | 98.6740(10)                                    | 102.901(3)                                                         | 103.315(2)                                                                       | 90.9260(10)                                                                      | 110.1570(10)                                                     |
| γ, deg                                                                                                                                                                                                                              | 90                                             | 90                                                                 | 90                                                                               | 90                                                                               | 90                                                               |
| V, Å <sup>3</sup>                                                                                                                                                                                                                   | 1697.03(7)                                     | 2271.5(2)                                                          | 2477.53(18)                                                                      | 2595.29(10)                                                                      | 4206.86(16)                                                      |
| Z                                                                                                                                                                                                                                   | 4                                              | 4                                                                  | 4                                                                                | 4                                                                                | 8                                                                |
| T, K                                                                                                                                                                                                                                | 100(2)                                         | 100(2)                                                             | 100(2)                                                                           | 100(2)                                                                           | 100(2)                                                           |
| ρ calcd, Mg m <sup>-3</sup>                                                                                                                                                                                                         | 1.289                                          | 1.987                                                              | 1.996                                                                            | 1.916                                                                            | 1.890                                                            |
| λ(Cu Kα), Å                                                                                                                                                                                                                         | 1.54178                                        | 1.54178                                                            | 1.54178                                                                          | 1.54178                                                                          | 1.54178                                                          |
| μ, mm <sup>-1</sup>                                                                                                                                                                                                                 | 0.631                                          | 12.830                                                             | 10.967                                                                           | 10.561                                                                           | 11.611                                                           |
| Abs. Correction                                                                                                                                                                                                                     | multi-scan                                     | multi-scan                                                         | numerical                                                                        | numerical                                                                        | numerical                                                        |
| F(000)                                                                                                                                                                                                                              | 696                                            | 1304                                                               | 1440                                                                             | 1456                                                                             | 2320                                                             |
| θ range [°]                                                                                                                                                                                                                         | 2.66 to 66.41                                  | 2.77 to 67.93                                                      | 2.90 to 67.71                                                                    | 3.51 to 67.78                                                                    | 3.83 to 67.85                                                    |
| Reflns collected                                                                                                                                                                                                                    | 13695                                          | 35582                                                              | 20721                                                                            | 21636                                                                            | 17421                                                            |
| Indep. reflns                                                                                                                                                                                                                       | 2889 (R <sub>int</sub> 0.0242)                 | 4046(R <sub>int</sub> 0.1068)                                      | 4328(R <sub>int</sub> 0.0372)                                                    | 4638(R <sub>int</sub> 0.0197)                                                    | 3759(R <sub>int</sub> 0.0199)                                    |
| T <sub>min</sub> /max                                                                                                                                                                                                               | 0.7865/0.9513                                  | 0.2060/0.6279                                                      | 0.3627/0.6744                                                                    | 0.1306/0.4336                                                                    | 0.1143/0.2748                                                    |
| Data/restraints/parameters                                                                                                                                                                                                          | 2889/2/464                                     | 4046/0/300                                                         | 4328/21/392                                                                      | 4638/0/367                                                                       | 3759/0/292                                                       |
| Goodness-of-fit on F <sup>2</sup>                                                                                                                                                                                                   | 0.985                                          | 1.042                                                              | 1.009                                                                            | 1.022                                                                            | 1.002                                                            |
| R[>2σ(I)] <sup>c</sup> (all data)                                                                                                                                                                                                   | 0.0282 (0.0292)                                | 0.0438 (0.0467)                                                    | 0.0267 (0.0321)                                                                  | 0.0196 (0.0205)                                                                  | 0.0172 (0.0173)                                                  |
| wR <sup>d</sup> (all data)                                                                                                                                                                                                          | 0.0731 (0.0738)                                | 0.1059 (0.1073)                                                    | 0.0657 (0.0678)                                                                  | 0.0509 (0.0514)                                                                  | 0.0489 (0.0490)                                                  |
| R = Σ  F <sub>o</sub>   -   F <sub>c</sub>   /Σ F <sub>o</sub>  . <sup>d</sup> wR = [Σw( F <sub>o</sub> <sup>2</sup>  - F <sub>c</sub> <sup>2</sup> ) <sup>2</sup> ]/Σw F <sub>o</sub> <sup>2</sup>   <sup>2</sup> ] <sup>1/2</sup> |                                                |                                                                    |                                                                                  |                                                                                  |                                                                  |

**Figure S-1.** Structure Diagrams with Atom Labeling of  $\text{ReBr}(\text{CO})_3[\text{H}(\text{L})]$  (**1**),  $\{\text{Re}(\text{CO})_3[\text{H}(\text{L})]\}(\text{PF}_6)$  (**2·PF<sub>6</sub>**),  $\{\text{Re}(\text{CO})_3[\text{H}(\text{L})]\}(\text{OTf})$  (**2·OTf**), and  $\text{Re}(\text{CO})_3(\text{L})$ , (**3**).

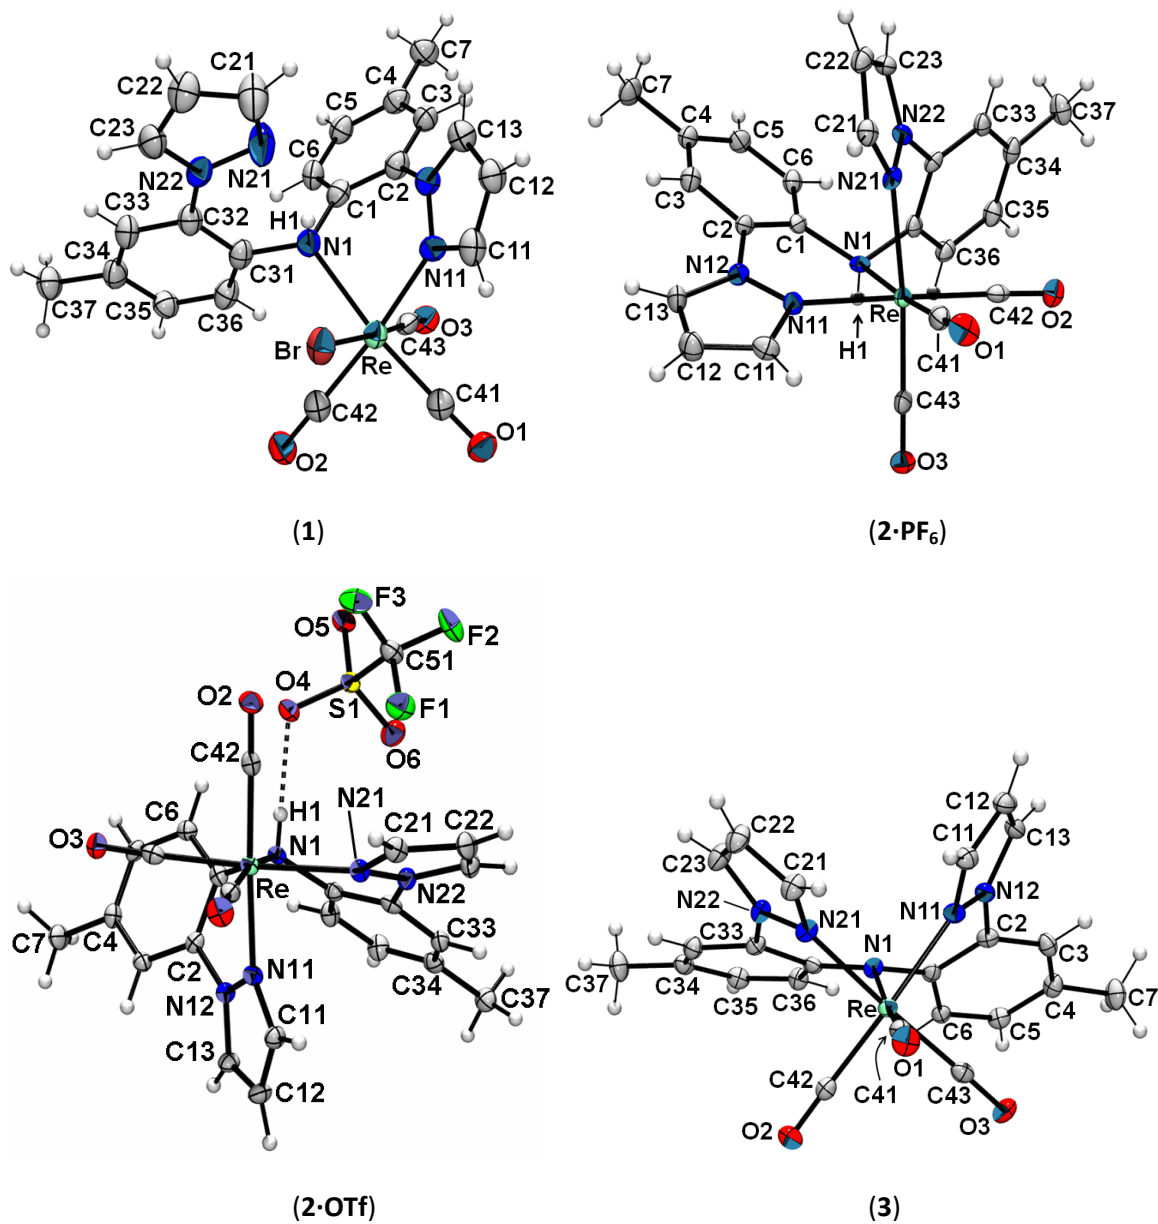

**Table S-2.** Summary of Bond Distances and Angles in Rhenium Complexes **1-3**.

| Distance (Å)                                                                                                                                                                                                                                                                                                                                                                                                                | <b>1</b> | <b>2·PF<sub>6</sub></b> | <b>2·OTf</b> | <b>3</b> |
|-----------------------------------------------------------------------------------------------------------------------------------------------------------------------------------------------------------------------------------------------------------------------------------------------------------------------------------------------------------------------------------------------------------------------------|----------|-------------------------|--------------|----------|
| Re-Br                                                                                                                                                                                                                                                                                                                                                                                                                       | 2.619    | ---                     | ---          | ---      |
| Re-N1                                                                                                                                                                                                                                                                                                                                                                                                                       | 2.265    | 2.257                   | 2.249        | 2.163    |
| Re-N11                                                                                                                                                                                                                                                                                                                                                                                                                      | 2.182    | 2.174                   | 2.169        | 2.173    |
| Re-N21                                                                                                                                                                                                                                                                                                                                                                                                                      | ---      | 2.180                   | 2.174        | 2.148    |
| Re-C41                                                                                                                                                                                                                                                                                                                                                                                                                      | 1.899    | 1.915                   | 1.910        | 1.914    |
| Re-C42                                                                                                                                                                                                                                                                                                                                                                                                                      | 1.928    | 1.944                   | 1.936        | 1.923    |
| Re-C43                                                                                                                                                                                                                                                                                                                                                                                                                      | 1.946    | 1.933                   | 1.933        | 1.948    |
| C41-O1                                                                                                                                                                                                                                                                                                                                                                                                                      | 1.164    | 1.149                   | 1.150        | 1.158    |
| C42-O2                                                                                                                                                                                                                                                                                                                                                                                                                      | 1.142    | 1.129                   | 1.144        | 1.147    |
| C43-O3                                                                                                                                                                                                                                                                                                                                                                                                                      | 1.091    | 1.140                   | 1.139        | 1.138    |
| N1H1••N21(or O4)                                                                                                                                                                                                                                                                                                                                                                                                            | 1.913    |                         | 2.014        |          |
| ⊥N1•••(C <sub>2</sub> Re) <sup>a</sup>                                                                                                                                                                                                                                                                                                                                                                                      | 0.383    | 0.492                   | 0.488        | 0.191    |
| Angles/torsions (°)                                                                                                                                                                                                                                                                                                                                                                                                         |          |                         |              |          |
| N1-Re-N11                                                                                                                                                                                                                                                                                                                                                                                                                   | 77.15    | 77.75                   | 76.61        | 79.26    |
| N1-Re-N21                                                                                                                                                                                                                                                                                                                                                                                                                   | ---      | 83.68                   | 83.76        | 81.57    |
| Fold (N11) <sup>b</sup>                                                                                                                                                                                                                                                                                                                                                                                                     | 138.81   | 130.62                  | 123.45       | 136.17   |
| Fold (N21) <sup>c</sup>                                                                                                                                                                                                                                                                                                                                                                                                     | ---      | 159.24                  | 154.62       | 147.36   |
| ReN11-N12C2                                                                                                                                                                                                                                                                                                                                                                                                                 | -16.09   | 14.07                   | 0.61         | -14.34   |
| ReN21-N22C32                                                                                                                                                                                                                                                                                                                                                                                                                | ---      | -9.76                   | -18.36       | 8.35     |
| pz(N11)-tol(C1)                                                                                                                                                                                                                                                                                                                                                                                                             | 40.80    | 43.63                   | 32.29        | 45.04    |
| pz(N21)-tol(C31)                                                                                                                                                                                                                                                                                                                                                                                                            | 13.63    | 27.21                   | 29.82        | 36.32    |
| tol(C1)- tol(C31)                                                                                                                                                                                                                                                                                                                                                                                                           | 76.86    | 74.55                   | 76.03        | 28.43    |
| Σ∠'s about N1 <sup>d</sup>                                                                                                                                                                                                                                                                                                                                                                                                  | 344.44   | 334.46                  | 334.85       | 355.62   |
| pz = mean plane of pyrazolyl ring , tol = mean plane of C <sub>6</sub> ring of tolyl group; <sup>a</sup> Distance of normal vector between N1 and mean plane of atoms Re, C1, and C31; <sup>b</sup> fold angle between Re and the centroids (Ct) of N1 and N11 and Ct of C1 and N12; <sup>c</sup> fold angle between Re and the centroids (Ct) of N1 and N21 and Ct of C31 and N22; <sup>d</sup> involving Re, C1, and C31. |          |                         |              |          |

### Spectroscopic and Electrochemical Characterization.

**Figure S-3.** Overlay of IR spectroscopic data for carbonyl stretching region of **1** obtained from (a) KBr pellets and (b) from CH<sub>2</sub>Cl<sub>2</sub> solutions.

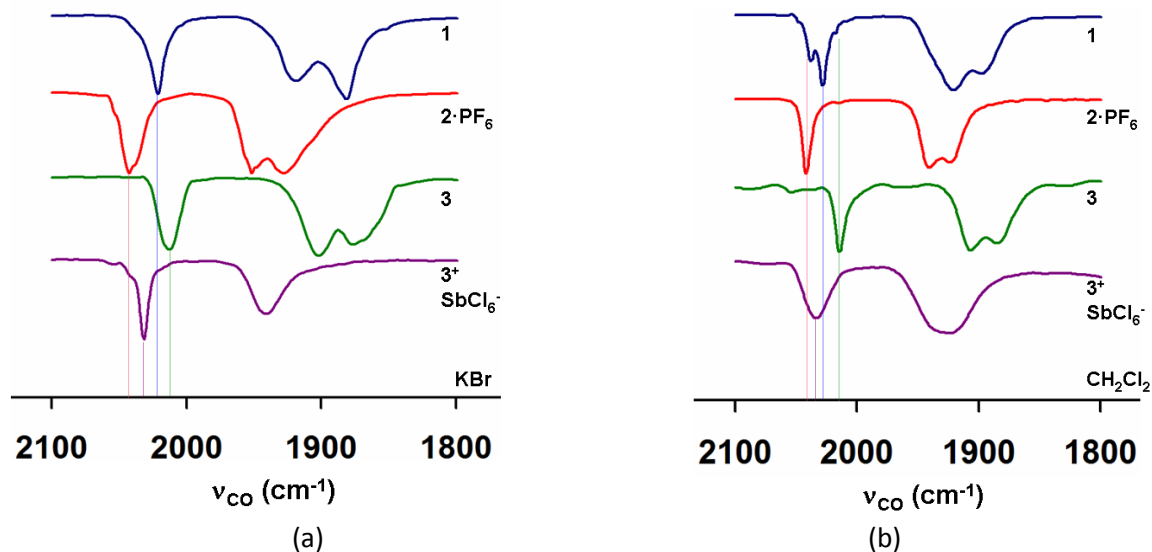

**Figure S-4.** Top: Cyclic voltammograms of **3** in CH<sub>2</sub>Cl<sub>2</sub> with NBu<sub>4</sub>PF<sub>6</sub> as supporting electrolyte recorded at 100 mV/s. Bottom: Scan rate dependence of **3** in CH<sub>2</sub>Cl<sub>2</sub> and in CH<sub>3</sub>CN

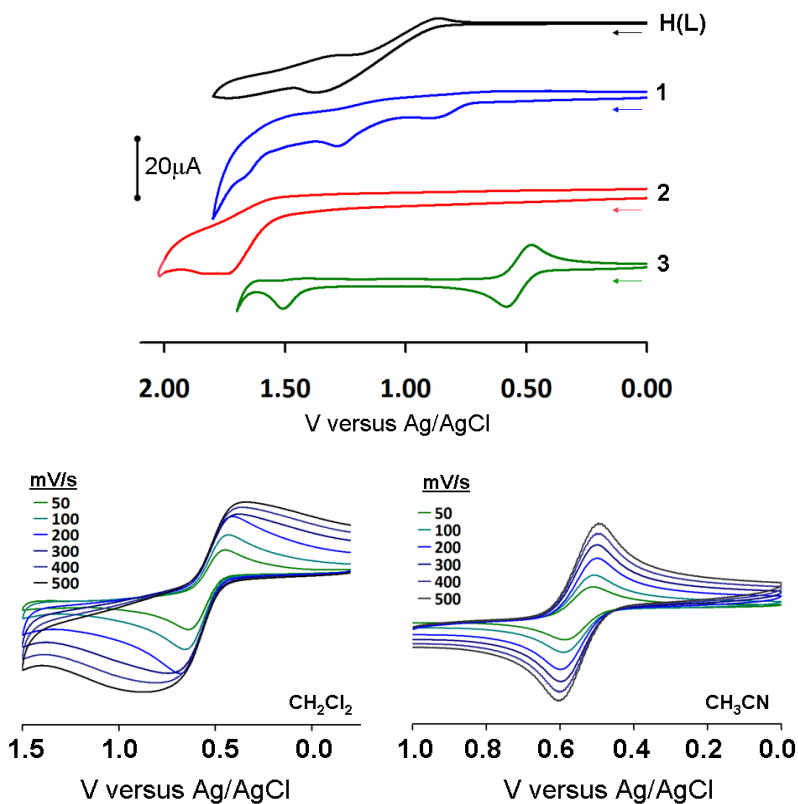

**Figure S-5.** Overlay of the electronic absorption spectra of each **1** and **2**·PF<sub>6</sub> in CD<sub>2</sub>Cl<sub>2</sub> at 293 K

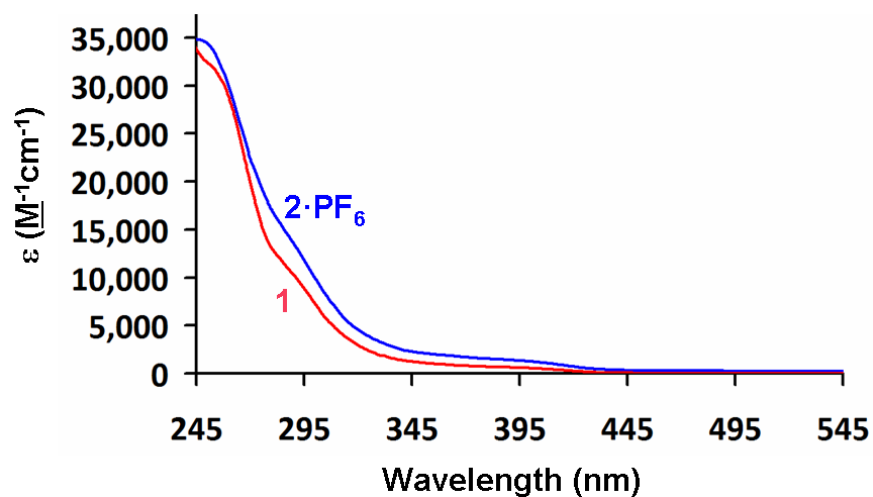

**Figure S-6.** ESI(+) mass spectrum of **1** (CH<sub>3</sub>CN).

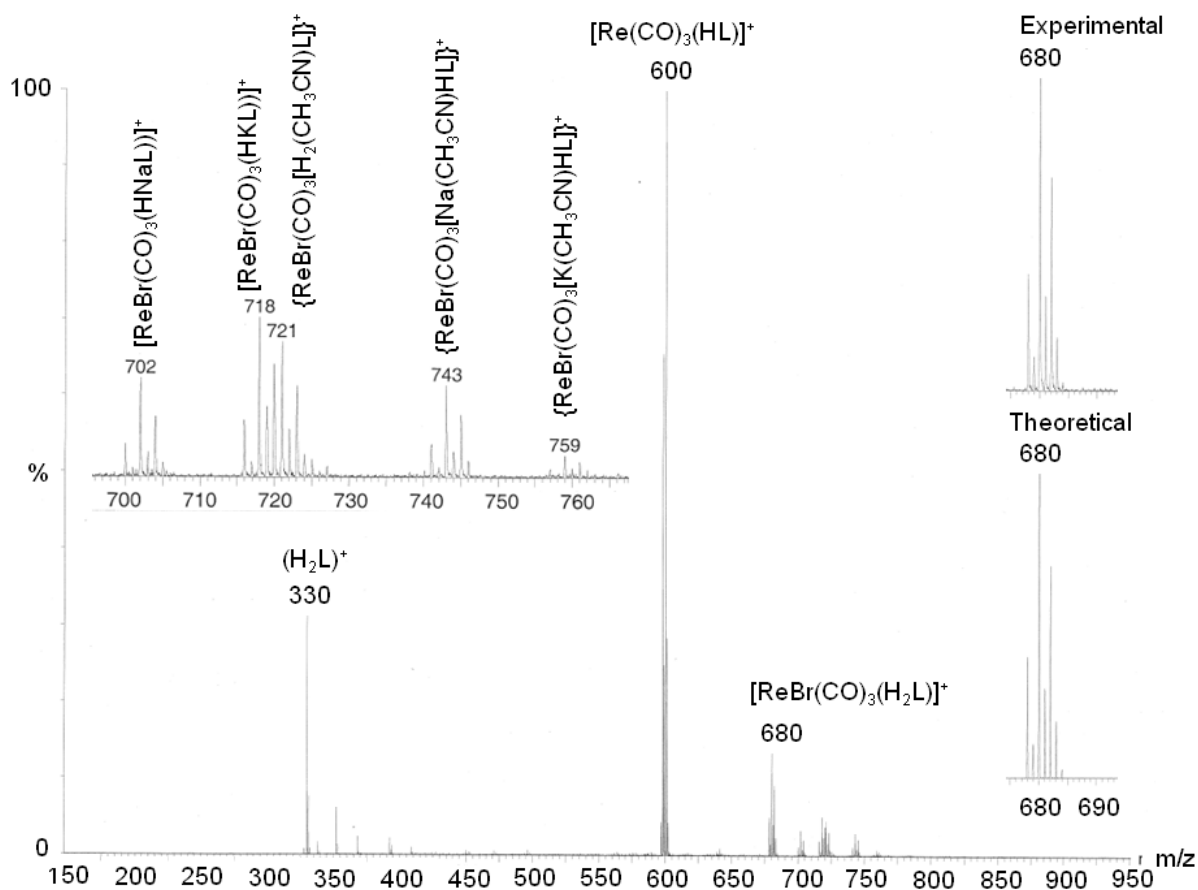

**Figure S-7.** ESI(+) mass spectrum of **2**·PF<sub>6</sub> (CH<sub>3</sub>CN).

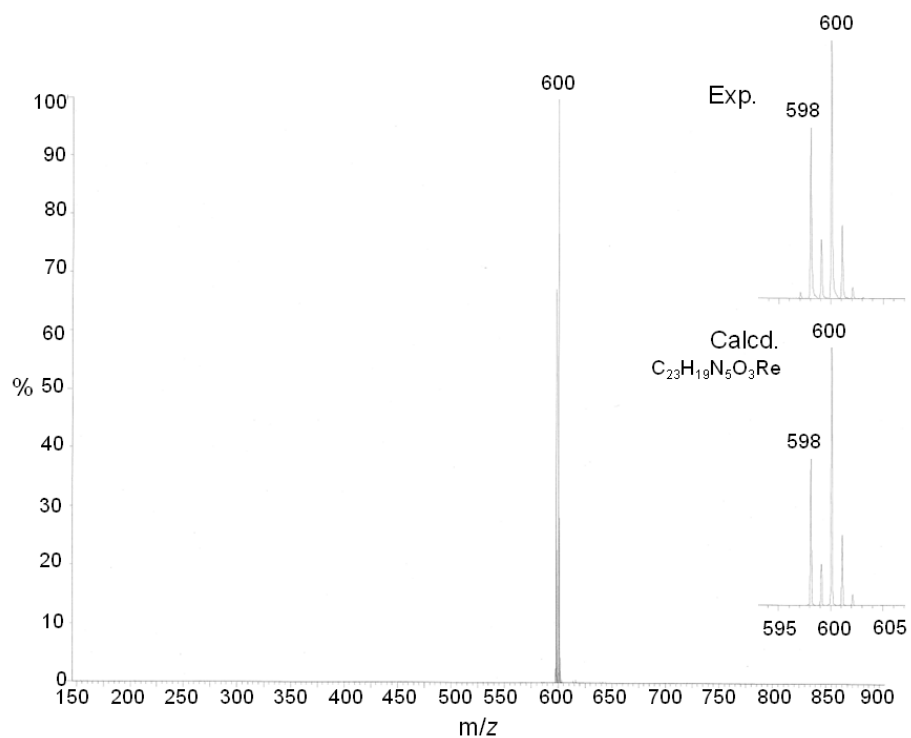

**Figure S-8.** Direct Exposure Probe (EI) mass spectrum of **3**.

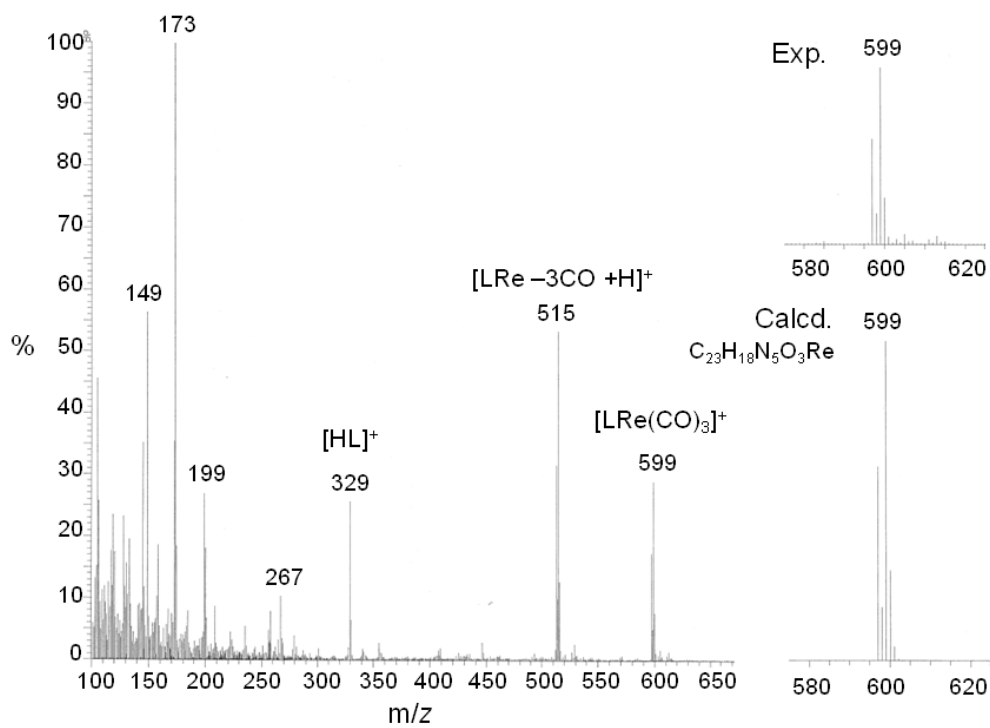

**Figure S-9.** The 400 MHz  $^1\text{H}$  NMR spectrum of **1** in  $\text{CD}_2\text{Cl}_2$  (\*) at 293 K with three main species **I** (major asymmetric), **II** (Symmetric), **III** (minor asymmetric) easily identified in the N-H,  $\text{H}_4\text{pz}$ , and  $\text{CH}_3$  regions.

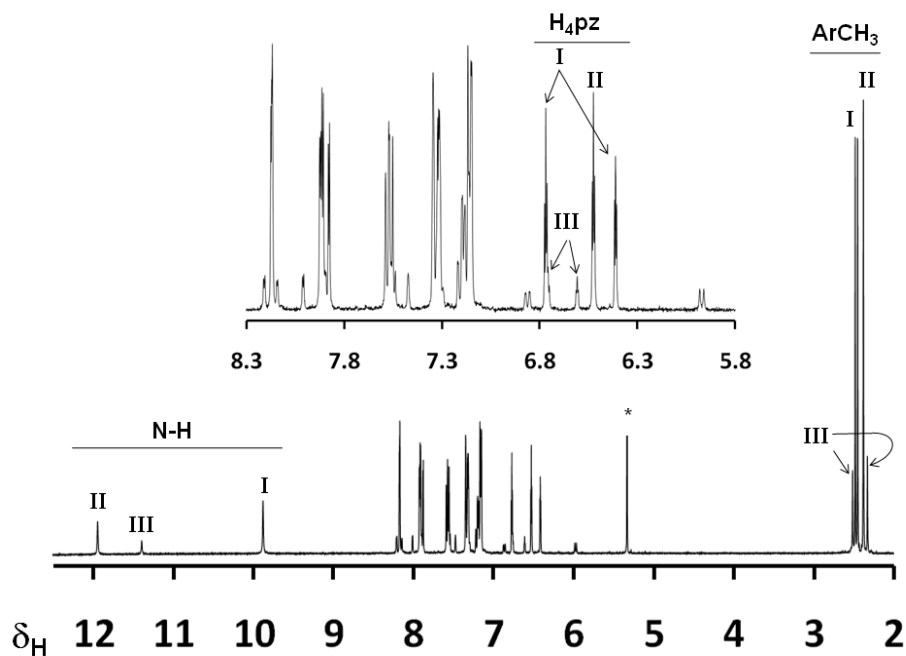

**Figure S-10.** The aromatic region of the DQCOSY  $^1\text{H}$  NMR spectrum (400 MHz) of **1** in  $\text{CD}_2\text{Cl}_2$  at 293 K.

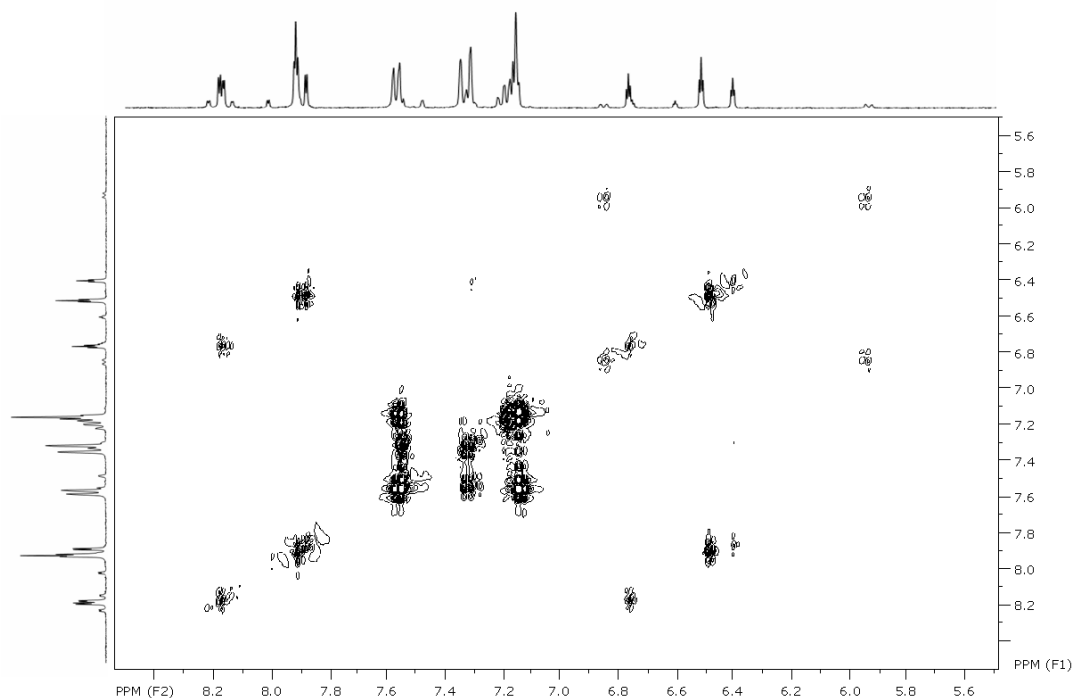

**Figure S-11.** General features of variable temperature  $^1\text{H}$  NMR spectra of **1** in (a)  $\text{CD}_2\text{Cl}_2$  ( $\delta_{\text{H}} = 5.33$  ppm) and in (b)  $\text{C}_2\text{D}_2\text{Cl}_4$  (aromatic region emphasized, with NH region inset). Red squares: Major asymmetric species, **I**; Blue circles: symmetric species, **II**; green triangles: Minor asymmetric species, **III**.

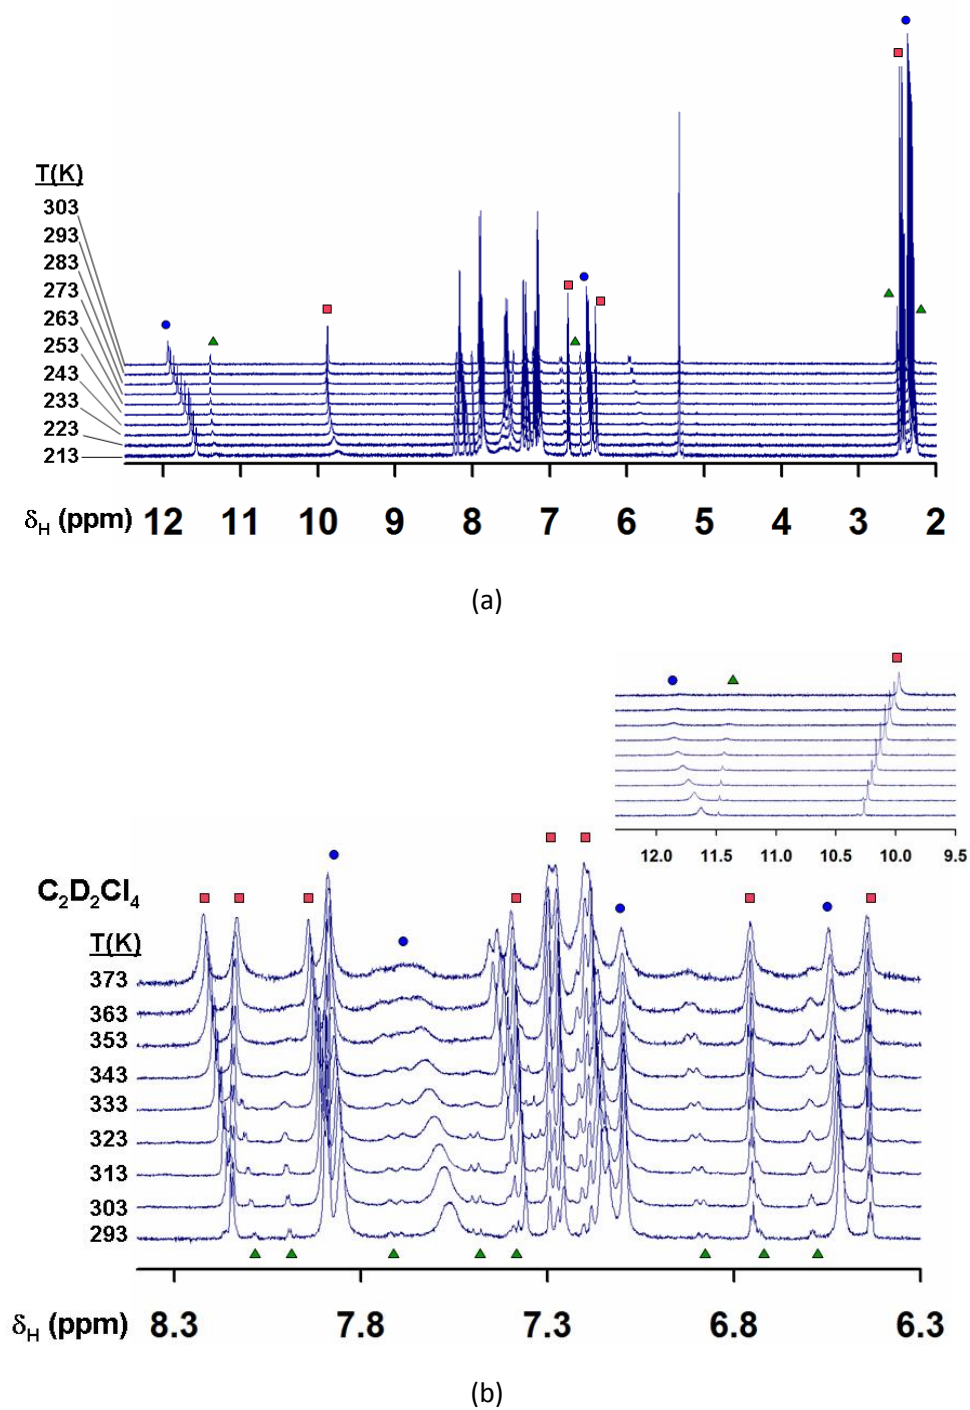

**Figure S-12.** Relative composition of three species as a function of temperature, obtained by averaging the relative integrations of N-H, H<sub>4</sub>pz, and CH<sub>3</sub>- regions of the <sup>1</sup>H NMR spectra, of **1** in (a) CD<sub>2</sub>Cl<sub>2</sub> and (b) C<sub>2</sub>D<sub>2</sub>Cl<sub>4</sub>.

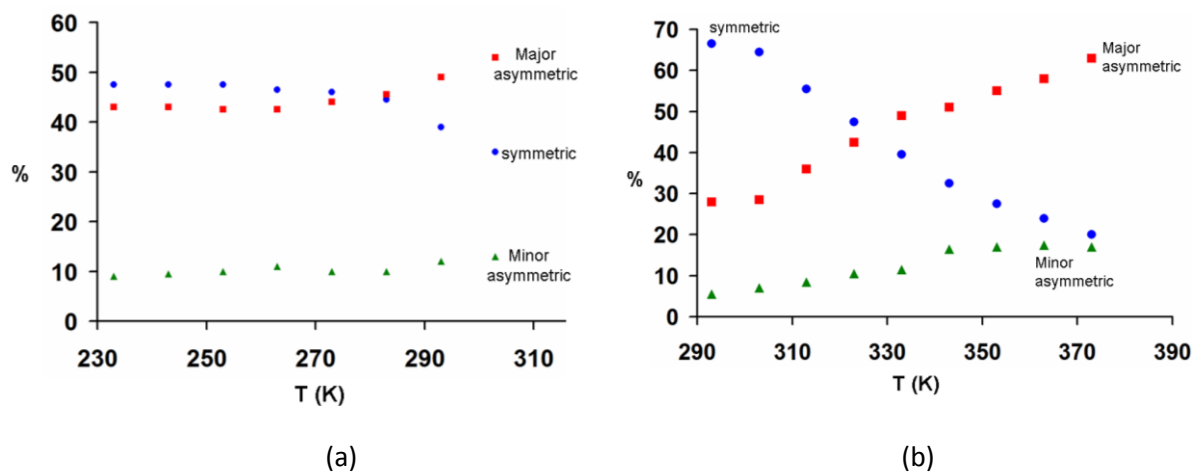

**Figure S-13.** Variable temperature <sup>1</sup>H NMR spectra of (a) **2**·PF<sub>6</sub> and (b) **2**·OTf in CD<sub>2</sub>Cl<sub>2</sub>.

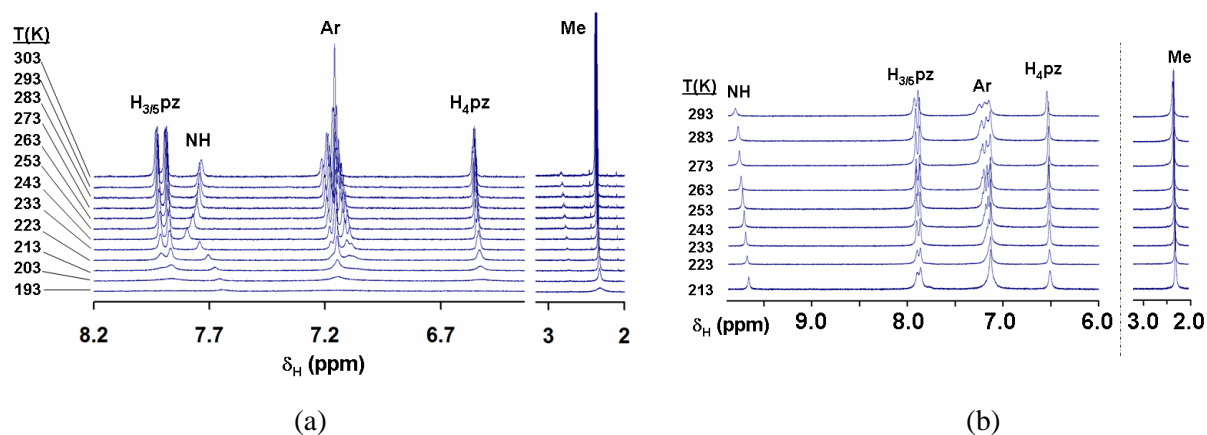

**Figure S-14.** Variable temperature  $^1\text{H}$  NMR spectrum of **3** in  $\text{CD}_2\text{Cl}_2$ .

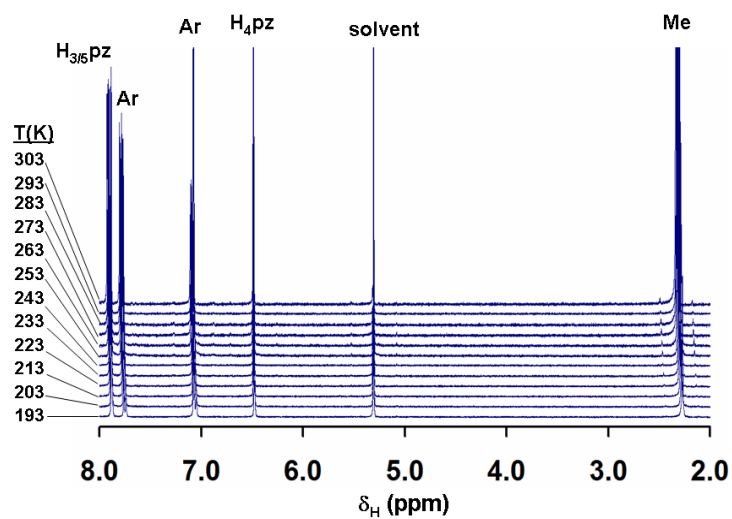

**Table S-3.** Summary of room temperature (293 K)  $^1\text{H}$  NMR chemical shift data ( $\text{CD}_2\text{Cl}_2$ ).

| Assign                | H(L) | Re(CO) <sub>3</sub> Br[H(L)] ( <b>1</b> ) |          |          | [Re(CO) <sub>3</sub> [H(L)] <sup>+</sup> ( <b>2</b> ) |                              | Re(CO) <sub>3</sub> L ( <b>3</b> ) |
|-----------------------|------|-------------------------------------------|----------|----------|-------------------------------------------------------|------------------------------|------------------------------------|
|                       |      | symm                                      | asym min | asym maj | OTf                                                   | PF <sub>6</sub> <sup>-</sup> |                                    |
| NH                    | 8.48 | 11.92                                     | 11.40    | 9.89     | 9.79                                                  | 7.77                         | ---                                |
| H <sub>3</sub> pz bnd |      | 7.92                                      | 8.13     | 8.17     | 7.93                                                  | 7.95                         | 7.95                               |
| H <sub>3</sub> pz unb | 7.72 |                                           | 7.90     | 7.31     |                                                       |                              |                                    |
| H <sub>3</sub> pz bnd |      | 7.91                                      | 8.22     | 8.18     | 7.89                                                  | 7.92                         | 7.92                               |
| H <sub>5</sub> pz unb | 7.68 |                                           | 8.01     | 7.88     |                                                       |                              |                                    |
| H <sub>4</sub> pz bnd |      | 6.51                                      | 6.76     | 6.77     | 6.55                                                  | 6.58                         | 6.51                               |
| H <sub>4</sub> pz unb | 6.43 |                                           | 6.61     | 6.41     |                                                       |                              |                                    |
| Ar <sub>AB</sub> bnd  |      | 7.57                                      | 6.86     | 7.58     | 7.26                                                  | 7.22                         | 7.81                               |
| Ar <sub>AB</sub> unb  | 7.25 |                                           | 7.55     | 7.21     |                                                       |                              |                                    |
| Ar <sub>AB'</sub> bnd |      | 7.32                                      | 5.94     | 7.18     | 7.19                                                  | 7.18                         | 7.12                               |
| Ar <sub>AB'</sub> unb | 7.03 |                                           | 7.35     | 7.14     |                                                       |                              |                                    |
| Ar-H bnd              |      | 7.36                                      | 7.48     | 7.35     | 7.15                                                  | 7.17                         | 7.10                               |
| Ar-H unb              | 7.12 |                                           | 7.09     | 7.17     |                                                       |                              |                                    |
| CH <sub>3</sub> bnd   |      | 2.37                                      | 2.51     | 2.47     | 2.39                                                  | 2.41                         | 2.36                               |
| CH <sub>3</sub> unb   | 2.30 |                                           | 2.32     | 2.44     |                                                       |                              |                                    |

The  $^1\text{H}$  NMR spectrum of pure **1** in various solvents is much more complicated than anticipated from the solid state structure owing to the presence of three species tentatively assigned based on comparison of solution properties [NMR, IR, CV, UV, ESI(+)] of related species and on molecular modeling, as arising from different (interconvertible) geometric and coordination isomers of  $\text{ReBr}(\text{CO})_3[\text{H}(\text{L})]$ , shown in Scheme S-1. That is, if the solid state structure of **1** were retained in solution (similar to the right of Scheme S-1), the  $^1\text{H}$  NMR

symmetric

asymmetric

minor

major

-131 kJ

-142 kJ

-26 kJ

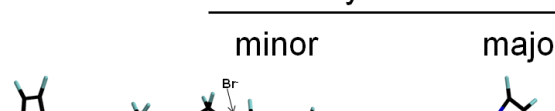

S-23

solid state. The resonances in the region 6.0 to 6.7 ppm for 4-pyrazolyl hydrogens and in the region 2.2 to 2.5 ppm for tolyl-CH<sub>3</sub> hydrogens are sufficiently resolved (Figure S-9) to allow relative integrations which reproduce the 48 (symmetric): 42 (major asymmetric): 10 (minor asymmetric) ratio observed in the N-H region of the spectrum and also allow assignments to the latter hydrogens. The resonances for the remaining hydrogens of each species could be assigned by examining the cross-peaks in the DQCOSY <sup>1</sup>H NMR spectrum (Figure S-10), by their temperature dependence, as well as by comparison of chemical shifts and relative intensities in different solvents (Figures S-11 to S-14), features that will be elaborated on in the full paper. The signals for the major asymmetric species are most likely due to the intact complex **1** (right of Figure) on the basis of IR, cyclic voltammetry and to a lesser extent ESI(+) mass spectrometry for CH<sub>3</sub>CN solutions. That is the solid state IR spectrum (Figure S-3, left) for **1** consists of an intense sharp single A<sub>1</sub> (if one assumes C<sub>3v</sub> local symmetry) C-O stretch at 2020 cm<sup>-1</sup> which is in between that for **2·X** (2042 cm<sup>-1</sup>) and **3** (2013 cm<sup>-1</sup>), as expected. On the other hand, the solution (CH<sub>2</sub>Cl<sub>2</sub>) spectrum of **1** (Figure S-3, right) consists of three sharp A<sub>1</sub> (if one assumes C<sub>3v</sub> local symmetry) C-O stretches at 2038, 2029, and 2017 cm<sup>-1</sup> (minor). The first band is consistent with the energy range for **2·X** and the lowest-energy minor band consistent with the deprotonated amido **3**; the intense band at 2029 is likely due to intact **1**. Moreover, the cyclic voltammogram of **1** recorded in CH<sub>2</sub>Cl<sub>2</sub> (Figure S-4) shows an irreversible wave with E<sub>pa</sub> near +0.86 V (vs Ag/AgCl) due to the Br<sup>-</sup>/Br<sup>0</sup> couple, a fairly high-current irreversible wave with E<sub>pa</sub> near +1.26 V consistent with other (NN-L)Re<sup>I</sup>Br/(NN-L)Re<sup>II</sup>Br couples, and a more intense irreversible wave with E<sub>pa</sub> near +1.26 V consistent with cationic (NN-L)Re<sup>I</sup>/(NN-L)Re<sup>II</sup> couples.<sup>S9</sup> The ESI spectrum of **1** (Figure S-6) also shows that the parent ion (100% relative intensity) at m/z = 600 is due to {[H(L)]Re(CO)<sub>3</sub>}<sup>+</sup> but even under these conditions peaks for intact **1** and those for intact **1** bound to various cations present (H<sup>+</sup>, Na<sup>+</sup>, K<sup>+</sup>) under the conditions of the experiment (arising from the spectrometer, not impurities in the sample) are still observed. The assignment of the third (minor asymmetric) species as being due to the species in the middle of Scheme S-1 is the most tentative of the assignments, which is based on the observations from simple molecular mechanics modeling (MMFF) which identified this species as the lowest-energy structure of the multitude examined. This species can be considered as an intermediate arising from the ionization of **1** to give species such as **2**. An alternative assignment of the minor asymmetric species being due to different conformers of intact **1** where the axial and bromide groups are exchanged such that N-H and Re-CO are in the same direction with HN-ReC torsion near 0° or a conformer with a *fac*-Re(CO)<sub>3</sub> kernel possessing a HN-ReBr torsion of 90° was disfavored as these conformers were found to be nearly isoergonic, separated only by about 2 kcal in energy (with the latter being lowest energy), but cannot be excluded. Moreover, *trans*-Re(CO)<sub>3</sub> isomers seemed also less likely considering that only *fac*- isomers were ever observed throughout the series of coordination complexes of this ligand. This latter assignment and the mechanistic features for the interconversions of species will be probed in greater detail in the full paper that describes the effects of 3-pyrazolyl substitution on the properties of the complexes.

**Figure S-15.** Spectrophotometric titration of **3** in CH<sub>2</sub>Cl<sub>2</sub> using (CRET<sup>+</sup>)(SbCl<sub>6</sub><sup>-</sup>) showing uncluttered character of one-electron transfer.

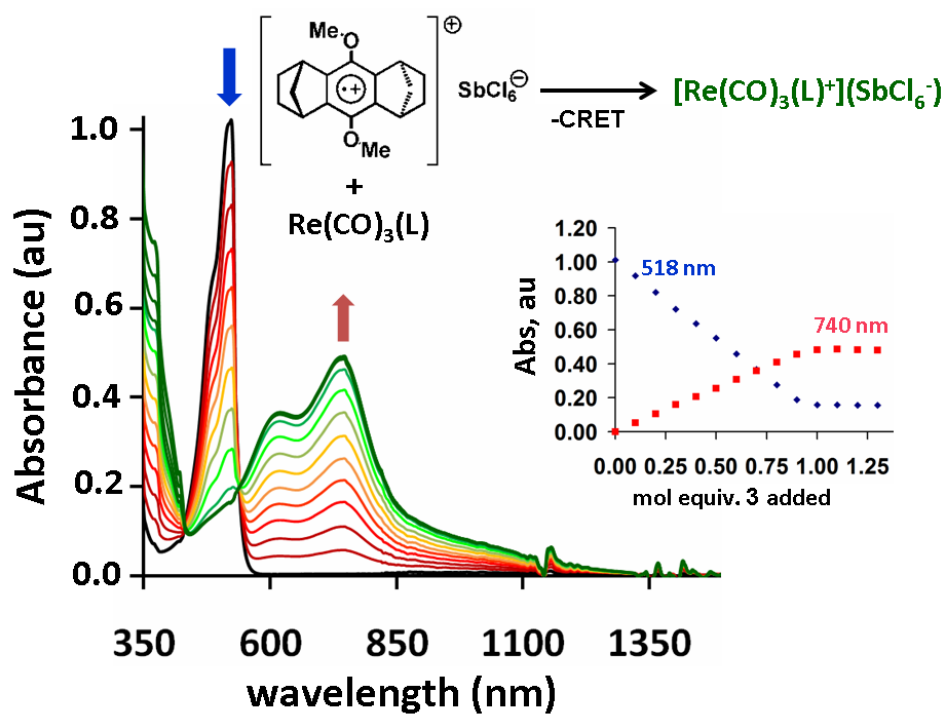

**Computational Details.** Calculations utilized the SPARTAN'08 program suite,<sup>S10</sup> where gas phase structures of the metal complexes were optimized using the BP86/6-31G\* density functional theoretical model owing to the demonstrated success of this model when applied to other complexes.<sup>S11</sup> In the current cases, the structures all possess C<sub>1</sub> symmetry and the agreement between this model and solid state structures was very good with the computational model closely replicating the main features of the solid state structures but with bond distances generally between 0.01 Å to 0.05 Å longer than experimental structures. Single point energy and time-dependent density functional calculations were performed on the energy-minimized structures using the hybrid B3LYP method, which incorporates Becke's three-parameter exchange functional (B3)<sup>S12</sup> with the Lee, Yang, and Parr (LYP)<sup>S13</sup> correlation functional where the LACVP\* effective core potential<sup>S14</sup> basis set was employed. The time-dependent density functional calculations were performed on the six lowest-energy singlet and six-lowest energy triplet excited states of each complex **1**, **2**<sup>+</sup>, and **3**, but only the first six excited doublet states of **3**<sup>+</sup> and the results are summarized in Figures S-17 to S-22 as well as in Tables S-9, pp S-39 to S-42.

**Figure S-16.** Overlay of experimental (green) and calculated structures ((u)BP86/LACVP\*) for **3** (black) and **3<sup>+</sup>** (pink) (hydrogens removed for clarity) and selected interatomic distances and angles tabulated.

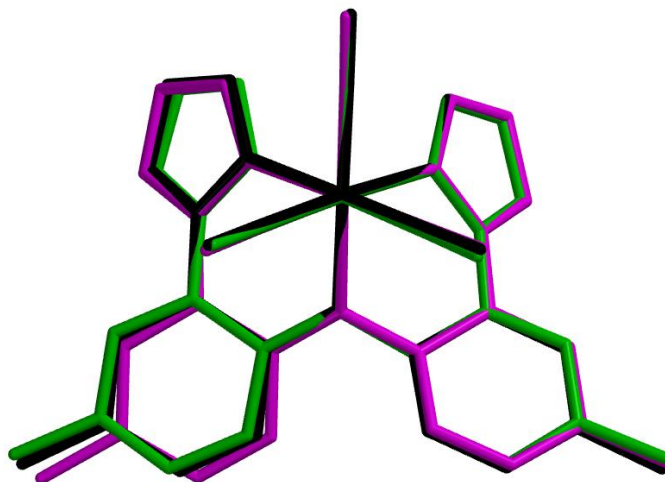

|                         | Experimental | Calculated [(U)BP86/LACVP*] |                      |
|-------------------------|--------------|-----------------------------|----------------------|
|                         | <b>3</b>     | <b>3</b>                    | <b>3<sup>+</sup></b> |
| Re-N <sub>Ar</sub> (Å)  | 2.163        | 2.185                       | 2.148                |
| Re-N <sub>pz</sub> (Å)  | 2.161        | 2.199                       | 2.193                |
| Re-C <sub>avg</sub> (Å) | 1.928        | 1.926                       | 1.940                |
| ReN-NC (°)              | 11.3         | 10.5                        | 8.7                  |
| pz-tolyl (°)            | 36.3         | 38.7                        | 36.7                 |
| tolyl-tolyl (°)         | 28.4         | 37.5                        | 42.6                 |

**Table S-4.** Cartesian coordinates for calculated structure of **1**.

Coordinates (Angstroms)

| I  | Atom | X         | Y         | Z         |
|----|------|-----------|-----------|-----------|
| 1  | Re   | 0.804133  | -1.224656 | -0.676135 |
| 2  | Br   | -0.694322 | -2.280073 | 1.257486  |
| 3  | O    | -1.161920 | -2.330919 | -2.797152 |
| 4  | O    | 2.472404  | 0.204259  | -2.854470 |
| 5  | O    | 2.506622  | -3.779384 | -0.951285 |
| 6  | N    | 2.006854  | -0.455066 | 1.000443  |
| 7  | N    | 2.201575  | 0.877639  | 1.287682  |
| 8  | N    | -1.511707 | 1.352923  | 2.387420  |
| 9  | N    | -2.638084 | 0.853845  | 1.779690  |
| 10 | N    | -0.329236 | 0.729218  | -0.046409 |
| 11 | H    | -0.398499 | 0.573295  | 0.984891  |
| 12 | C    | 2.589132  | -1.137528 | 2.004698  |
| 13 | H    | 2.528249  | -2.224300 | 2.009906  |
| 14 | C    | 3.174575  | -0.257860 | 2.939513  |
| 15 | H    | 3.702386  | -0.517524 | 3.854875  |
| 16 | C    | 2.905278  | 1.015385  | 2.458082  |
| 17 | H    | 3.119570  | 2.004269  | 2.857802  |
| 18 | C    | 1.786274  | 1.929999  | 0.419018  |
| 19 | C    | 2.649982  | 3.026311  | 0.253090  |
| 20 | H    | 3.636590  | 2.991598  | 0.727418  |
| 21 | C    | 2.287308  | 4.137089  | -0.525400 |
| 22 | C    | 1.023940  | 4.109134  | -1.143561 |
| 23 | H    | 0.699404  | 4.959422  | -1.754628 |
| 24 | C    | 0.163676  | 3.013181  | -1.000412 |
| 25 | H    | -0.815371 | 3.032810  | -1.484549 |
| 26 | C    | 0.525179  | 1.900997  | -0.225098 |
| 27 | C    | 3.236715  | 5.299003  | -0.721307 |
| 28 | H    | 2.702706  | 6.265056  | -0.684879 |
| 29 | H    | 3.738398  | 5.242197  | -1.705782 |
| 30 | H    | 4.024457  | 5.315726  | 0.050624  |
| 31 | C    | -1.698128 | 1.109914  | 3.694981  |
| 32 | H    | -0.926422 | 1.410413  | 4.404620  |
| 33 | C    | -2.934036 | 0.466368  | 3.945232  |
| 34 | H    | -3.343107 | 0.139521  | 4.899682  |
| 35 | C    | -3.508882 | 0.309435  | 2.692489  |
| 36 | H    | -4.431011 | -0.175762 | 2.379947  |
| 37 | C    | -2.798975 | 0.916708  | 0.367024  |
| 38 | C    | -4.107225 | 1.006450  | -0.149105 |
| 39 | H    | -4.942797 | 1.083675  | 0.554608  |
| 40 | C    | -4.363734 | 1.027360  | -1.527848 |
| 41 | C    | -3.261298 | 0.965674  | -2.403764 |
| 42 | H    | -3.422923 | 0.968742  | -3.487394 |
| 43 | C    | -1.958051 | 0.880373  | -1.906915 |
| 44 | H    | -1.111281 | 0.804190  | -2.596203 |
| 45 | C    | -1.700567 | 0.857510  | -0.525206 |
| 46 | C    | -5.777502 | 1.141148  | -2.055155 |
| 47 | H    | -6.518360 | 0.816380  | -1.304952 |
| 48 | H    | -5.916632 | 0.524498  | -2.960228 |
| 49 | H    | -6.021084 | 2.185123  | -2.331174 |
| 50 | C    | -0.415472 | -1.907277 | -1.996151 |
| 51 | C    | 1.840833  | -0.335511 | -2.015656 |
| 52 | C    | 1.848365  | -2.808719 | -0.871043 |

**Table S-5.** Cartesian coordinates for calculated structure of **2**.

| Coordinates (Angstroms) |      |           |           |
|-------------------------|------|-----------|-----------|
| I                       | Atom | X         | Y         |
|                         |      |           | Z         |
| 1                       | Re   | 0.896247  | -1.405138 |
| 2                       | O    | 3.942659  | -0.837151 |
| 3                       | O    | 1.515581  | -4.429957 |
| 4                       | O    | 1.091645  | -1.556714 |
| 5                       | N    | -1.255876 | -1.905205 |
| 6                       | N    | -2.140739 | -1.841653 |
| 7                       | N    | 0.340544  | 0.712152  |
| 8                       | N    | 0.783622  | 1.556308  |
| 9                       | N    | 0.501160  | -1.046798 |
| 10                      | H    | 0.677169  | -1.961632 |
| 11                      | C    | -1.818881 | -2.746152 |
| 12                      | H    | -1.288006 | -2.979530 |
| 13                      | C    | -3.054467 | -3.233771 |
| 14                      | H    | -3.720043 | -3.937512 |
| 15                      | C    | -3.228330 | -2.645530 |
| 16                      | H    | -4.020090 | -2.750727 |
| 17                      | C    | -2.038550 | -0.915712 |
| 18                      | C    | -3.252771 | -0.371433 |
| 19                      | H    | -4.171483 | -0.587754 |
| 20                      | C    | -3.319272 | 0.455167  |
| 21                      | C    | -2.109661 | 0.755000  |
| 22                      | H    | -2.112779 | 1.388042  |
| 23                      | C    | -0.895199 | 0.262565  |
| 24                      | H    | 0.032849  | 0.521023  |
| 25                      | C    | -0.828085 | -0.564253 |
| 26                      | C    | -4.640203 | 0.992795  |
| 27                      | H    | -5.435188 | 0.896711  |
| 28                      | H    | -4.559878 | 2.056544  |
| 29                      | H    | -4.968754 | 0.441801  |
| 30                      | C    | -0.453404 | 1.460998  |
| 31                      | H    | -0.927616 | 1.002963  |
| 32                      | C    | -0.527276 | 2.787395  |
| 33                      | H    | -1.090173 | 3.614302  |
| 34                      | C    | 0.268011  | 2.813409  |
| 35                      | H    | 0.492742  | 3.609602  |
| 36                      | C    | 1.716283  | 1.124789  |
| 37                      | C    | 2.778692  | 1.968375  |
| 38                      | H    | 2.883205  | 2.932281  |
| 39                      | C    | 3.735301  | 1.576352  |
| 40                      | C    | 3.599584  | 0.301825  |
| 41                      | H    | 4.333589  | -0.036786 |
| 42                      | C    | 2.540747  | -0.548801 |
| 43                      | H    | 2.451956  | -1.534223 |
| 44                      | C    | 1.591857  | -0.150134 |
| 45                      | C    | 4.903021  | 2.474371  |
| 46                      | H    | 5.250824  | 2.309045  |
| 47                      | H    | 4.644762  | 3.540660  |
| 48                      | H    | 5.758470  | 2.270099  |
| 49                      | C    | 2.790134  | -1.039285 |
| 50                      | C    | 1.287013  | -3.288326 |
| 51                      | C    | 1.049054  | -1.510397 |

**Table S-6.** Cartesian coordinates for calculated structure of **3**.

| Coordinates (Angstroms) |      |           |           |           |
|-------------------------|------|-----------|-----------|-----------|
| I                       | ATOM | X         | Y         | Z         |
| -----                   |      |           |           |           |
| 1                       | Re   | -0.192911 | 1.828400  | -1.226229 |
| 2                       | O    | -0.389511 | 4.857415  | -1.872684 |
| 3                       | O    | 1.598964  | 1.320824  | -3.702910 |
| 4                       | O    | -2.699187 | 1.289640  | -2.978442 |
| 5                       | N    | 1.549526  | 1.206831  | 0.438803  |
| 7                       | N    | -1.383074 | 2.008199  | 0.636258  |
| 8                       | N    | -2.072180 | 0.937867  | 1.158362  |
| 9                       | N    | -0.015316 | -0.180634 | -0.384358 |
| 10                      | C    | 1.944861  | 3.324529  | 0.643890  |
| 11                      | H    | 1.398007  | 4.246036  | 0.451560  |
| 12                      | C    | 3.069798  | 3.091977  | 1.454291  |
| 13                      | H    | 3.605157  | 3.807327  | 2.075424  |
| 14                      | C    | 3.337686  | 1.735005  | 1.312385  |
| 15                      | H    | 4.075850  | 1.092968  | 1.785645  |
| 16                      | C    | 2.401846  | -0.152017 | -0.012498 |
| 17                      | C    | 3.652180  | -0.802813 | -0.056047 |
| 18                      | H    | 4.561126  | -0.193458 | 0.007849  |
| 19                      | C    | 3.763231  | -2.193346 | -0.168494 |
| 20                      | C    | 2.553513  | -2.921474 | -0.183838 |
| 21                      | H    | 2.583988  | -4.018395 | -0.194590 |
| 22                      | C    | 1.313277  | -2.287010 | -0.216011 |
| 23                      | H    | 0.411651  | -2.902703 | -0.221048 |
| 24                      | C    | 1.174335  | -0.864849 | -0.234418 |
| 25                      | C    | -1.472728 | 2.989482  | 1.556341  |
| 26                      | H    | -0.992586 | 3.947947  | 1.367072  |
| 27                      | C    | -2.217243 | 2.565835  | 2.675978  |
| 28                      | H    | -2.447743 | 3.131424  | 3.576534  |
| 29                      | C    | -2.580385 | 1.254972  | 2.389053  |
| 30                      | H    | -3.134709 | 0.514017  | 2.961373  |
| 31                      | C    | -2.311142 | -0.255289 | 0.409445  |
| 32                      | C    | -3.602587 | -0.809648 | 0.442735  |
| 33                      | H    | -4.386392 | -0.294929 | 1.010573  |
| 34                      | C    | -3.907321 | -1.981075 | -0.267201 |
| 35                      | C    | -2.885083 | -2.539851 | -1.063433 |
| 36                      | H    | -3.106220 | -3.418883 | -1.681619 |
| 37                      | C    | -1.605997 | -1.979004 | -1.118632 |
| 38                      | H    | -0.864670 | -2.396831 | -1.805172 |
| 39                      | C    | -1.258538 | -0.834867 | -0.354410 |
| 40                      | C    | -5.285192 | -2.603764 | -0.205612 |
| 41                      | H    | -5.286968 | -3.516625 | 0.420689  |
| 42                      | H    | -5.639791 | -2.899682 | -1.209177 |
| 43                      | H    | -6.026754 | -1.907954 | 0.222762  |
| 44                      | C    | -0.329125 | 3.696800  | -1.665604 |
| 45                      | C    | 0.923408  | 1.519720  | -2.762151 |
| 46                      | C    | -1.757546 | 1.481688  | -2.302013 |
| 47                      | C    | 5.108082  | -2.879744 | -0.264571 |
| 48                      | H    | 5.343511  | -3.175922 | -1.305346 |
| 49                      | H    | 5.925785  | -2.222457 | 0.080079  |
| 50                      | H    | 5.134972  | -3.800679 | 0.346083  |
| -----                   |      |           |           |           |

**Table S-7.** Cartesian coordinates for calculated structure of **3<sup>+</sup>**.

| Coordinates (Angstroms) |           |           |           |
|-------------------------|-----------|-----------|-----------|
| I Atom                  | X         | Y         | Z         |
| -----                   |           |           |           |
| 1 Re                    | 0.074210  | 1.139831  | 0.653655  |
| 2 O                     | -1.650633 | 0.695408  | 3.198864  |
| 3 O                     | 0.151434  | 4.213500  | 1.145173  |
| 4 O                     | 2.679575  | 0.831781  | 2.318335  |
| 5 N                     | 1.206884  | 1.244810  | -1.238673 |
| 6 N                     | 1.918436  | 0.156220  | -1.701383 |
| 7 N                     | -1.729535 | 1.320725  | -0.549223 |
| 8 N                     | -2.588673 | 0.284651  | -0.831331 |
| 9 N                     | -0.021263 | -0.917670 | 0.047356  |
| 10 C                    | 1.245239  | 2.156389  | -2.231361 |
| 11 C                    | 1.973462  | 1.671361  | -3.336546 |
| 12 H                    | 2.165561  | 2.177666  | -4.280270 |
| 13 C                    | 2.387601  | 0.399272  | -2.965705 |
| 14 H                    | 2.957982  | -0.358461 | -3.499689 |
| 15 C                    | 2.245628  | -0.948421 | -0.857225 |
| 16 C                    | 3.547770  | -1.469251 | -0.904026 |
| 17 H                    | 4.282396  | -1.005308 | -1.570969 |
| 18 C                    | 3.939601  | -2.537334 | -0.075155 |
| 19 C                    | 2.986562  | -3.051923 | 0.828655  |
| 20 H                    | 3.276250  | -3.849216 | 1.522059  |
| 21 C                    | 1.683317  | -2.547863 | 0.878662  |
| 22 H                    | 0.979046  | -2.925501 | 1.625957  |
| 23 C                    | 1.272188  | -1.509013 | 0.013768  |
| 24 C                    | 5.357052  | -3.059028 | -0.100803 |
| 25 H                    | 5.393282  | -4.135175 | 0.137719  |
| 26 H                    | 5.979038  | -2.536434 | 0.650484  |
| 27 H                    | 5.831588  | -2.905163 | -1.084233 |
| 28 C                    | -2.240653 | 2.407431  | -1.160981 |
| 29 C                    | -3.421850 | 2.086328  | -1.860090 |
| 30 H                    | -4.043012 | 2.749554  | -2.458532 |
| 31 C                    | -3.612974 | 0.733611  | -1.639176 |
| 32 H                    | -4.362548 | 0.046769  | -2.023160 |
| 33 C                    | -2.440490 | -1.051457 | -0.363894 |
| 34 C                    | -3.612804 | -1.819104 | -0.274692 |
| 35 H                    | -4.581630 | -1.313916 | -0.330826 |
| 36 C                    | -3.585440 | -3.216999 | -0.121400 |
| 37 C                    | -2.315837 | -3.849613 | -0.124298 |
| 38 H                    | -2.255773 | -4.942776 | -0.085034 |
| 39 C                    | -1.146017 | -3.107058 | -0.144418 |
| 40 H                    | -0.185347 | -3.624243 | -0.125411 |
| 41 C                    | -1.151191 | -1.672740 | -0.148329 |
| 42 C                    | -4.853866 | -4.017915 | 0.012605  |
| 43 H                    | -4.916342 | -4.796923 | -0.769619 |
| 44 H                    | -5.753269 | -3.385376 | -0.057522 |
| 45 H                    | -4.883768 | -4.543413 | 0.985520  |
| 46 C                    | -0.999529 | 0.879440  | 2.245639  |
| 47 C                    | 1.702874  | 0.942889  | 1.685353  |
| 48 C                    | 0.138374  | 3.052514  | 0.994647  |
| 49 H                    | -1.737682 | 3.366889  | -1.052348 |
| 50 H                    | 0.750442  | 3.117956  | -2.101853 |
| -----                   |           |           |           |

**Table S-8.** Calculated SCF and Frontier Orbital Energies (eV) for **1**, **2**, **3**, and **3<sup>+</sup>**.

|                | <b>1</b>    | <b>2</b>    | <b>3</b>    | $\alpha$ - <b>3<sup>+</sup></b> | $\beta$ - <b>3<sup>+</sup></b> |
|----------------|-------------|-------------|-------------|---------------------------------|--------------------------------|
| LUMO(+5)       | +3.20       | +0.63       | +3.48       | +0.33                           | +0.19                          |
| LUMO(+4)       | +3.06       | +0.42       | +3.24       | +0.11                           | +0.02                          |
| LUMO(+3)       | +2.79       | +0.21       | +3.18       | -0.24                           | -0.31                          |
| LUMO(+2)       | +2.56       | -0.10       | +2.87       | -0.42                           | -0.73                          |
| LUMO(+1)       | +2.37       | -0.50       | +2.51       | -0.84                           | -0.83                          |
| LUMO           | +1.85       | -0.74       | +2.40       | -1.17                           | -4.05                          |
| HOMO           | -8.36       | -10.99      | -6.56       | -11.40                          | -11.49                         |
| HOMO(-1)       | -8.44       | -11.16      | -8.24       | -11.71                          | -11.66                         |
| HOMO(-2)       | -8.72       | -11.49      | -8.45       | -11.93                          | -11.86                         |
| HOMO(-3)       | -9.11       | -11.67      | -8.70       | -12.39                          | -12.33                         |
| HOMO(-4)       | -9.19       | -11.93      | -8.95       | -12.41                          | -12.44                         |
| HOMO(-5)       | -9.55       | -12.13      | -9.08       | -12.66                          | -12.66                         |
| SCF energy(au) | -1470.20948 | -1457.04671 | -1456.63159 | -1456.46797                     |                                |

**Fig. S-17.** Frontier Orbitals for  $\text{ReBr}(\text{CO})_3[(\text{HL})]$  (**1**) from DFT calculations (B3LYP/LACVP\*).

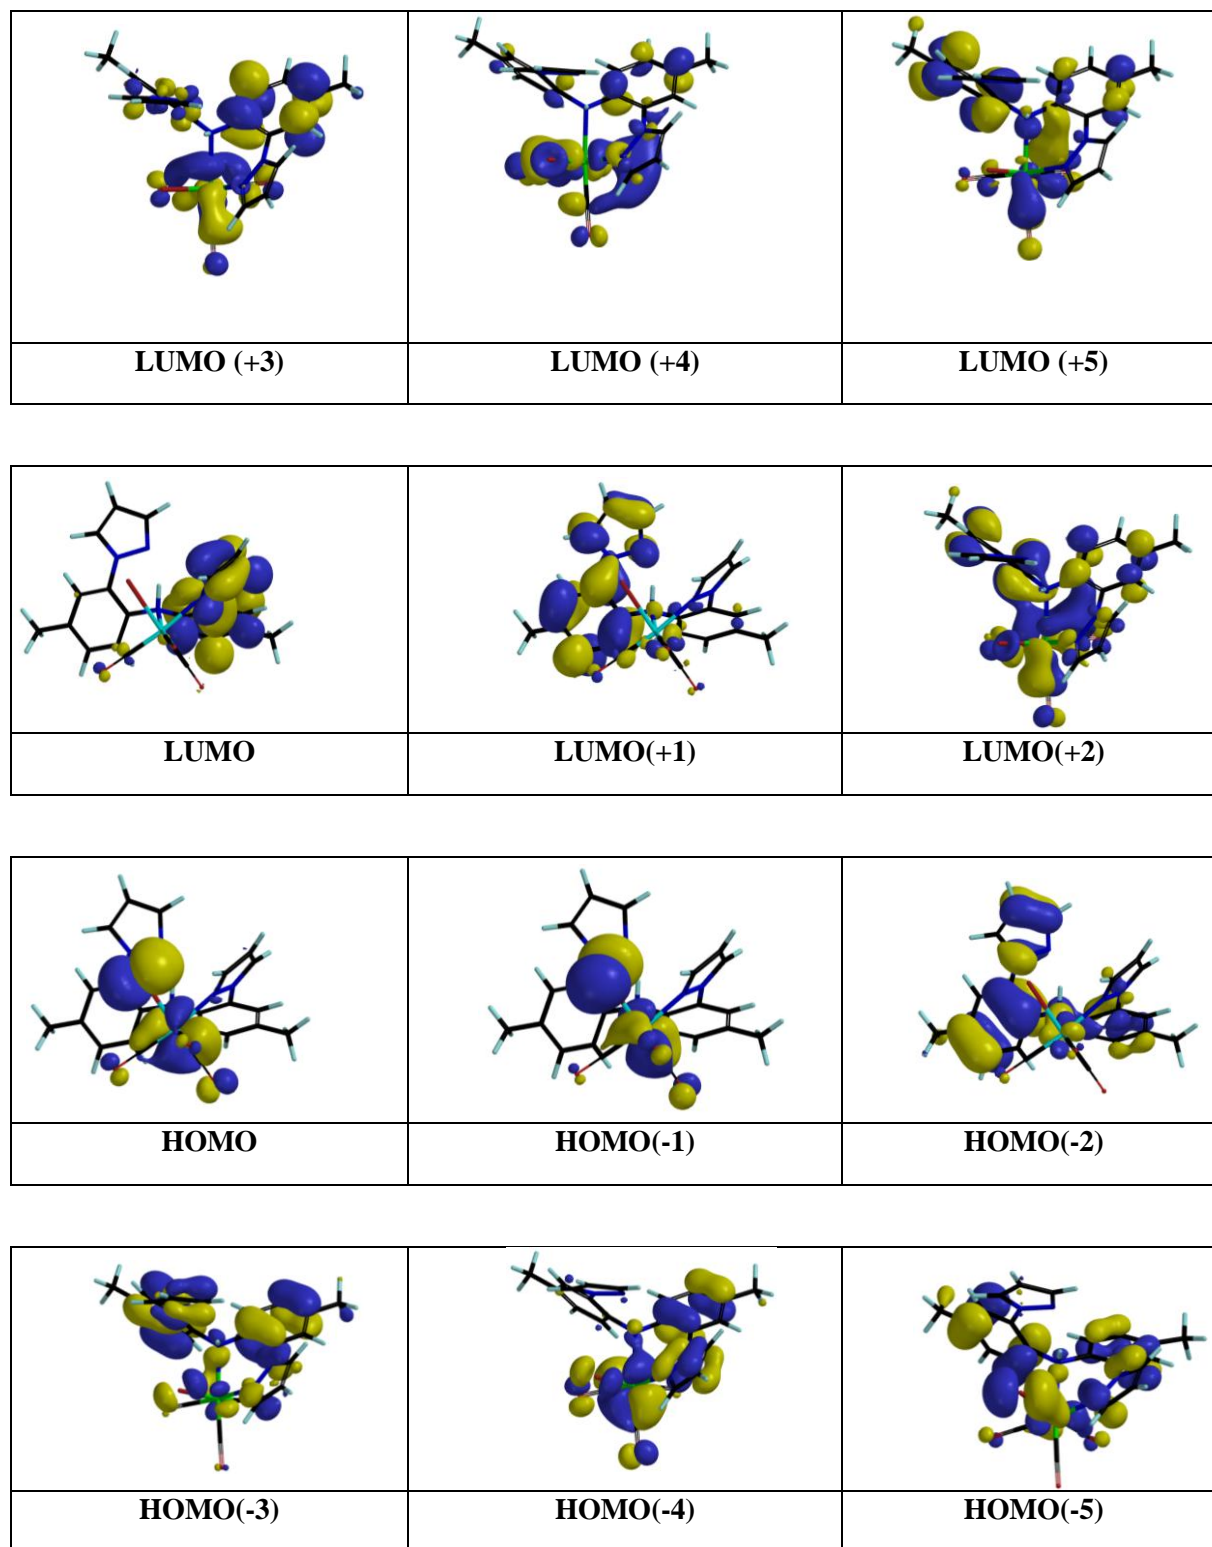

**Fig. S-18.** Frontier Orbitals for  $\{\text{Re}(\text{CO})_3[(\text{HL})]\}^+$  (**2**) from DFT calculations (B3LYP/LACVP\*).

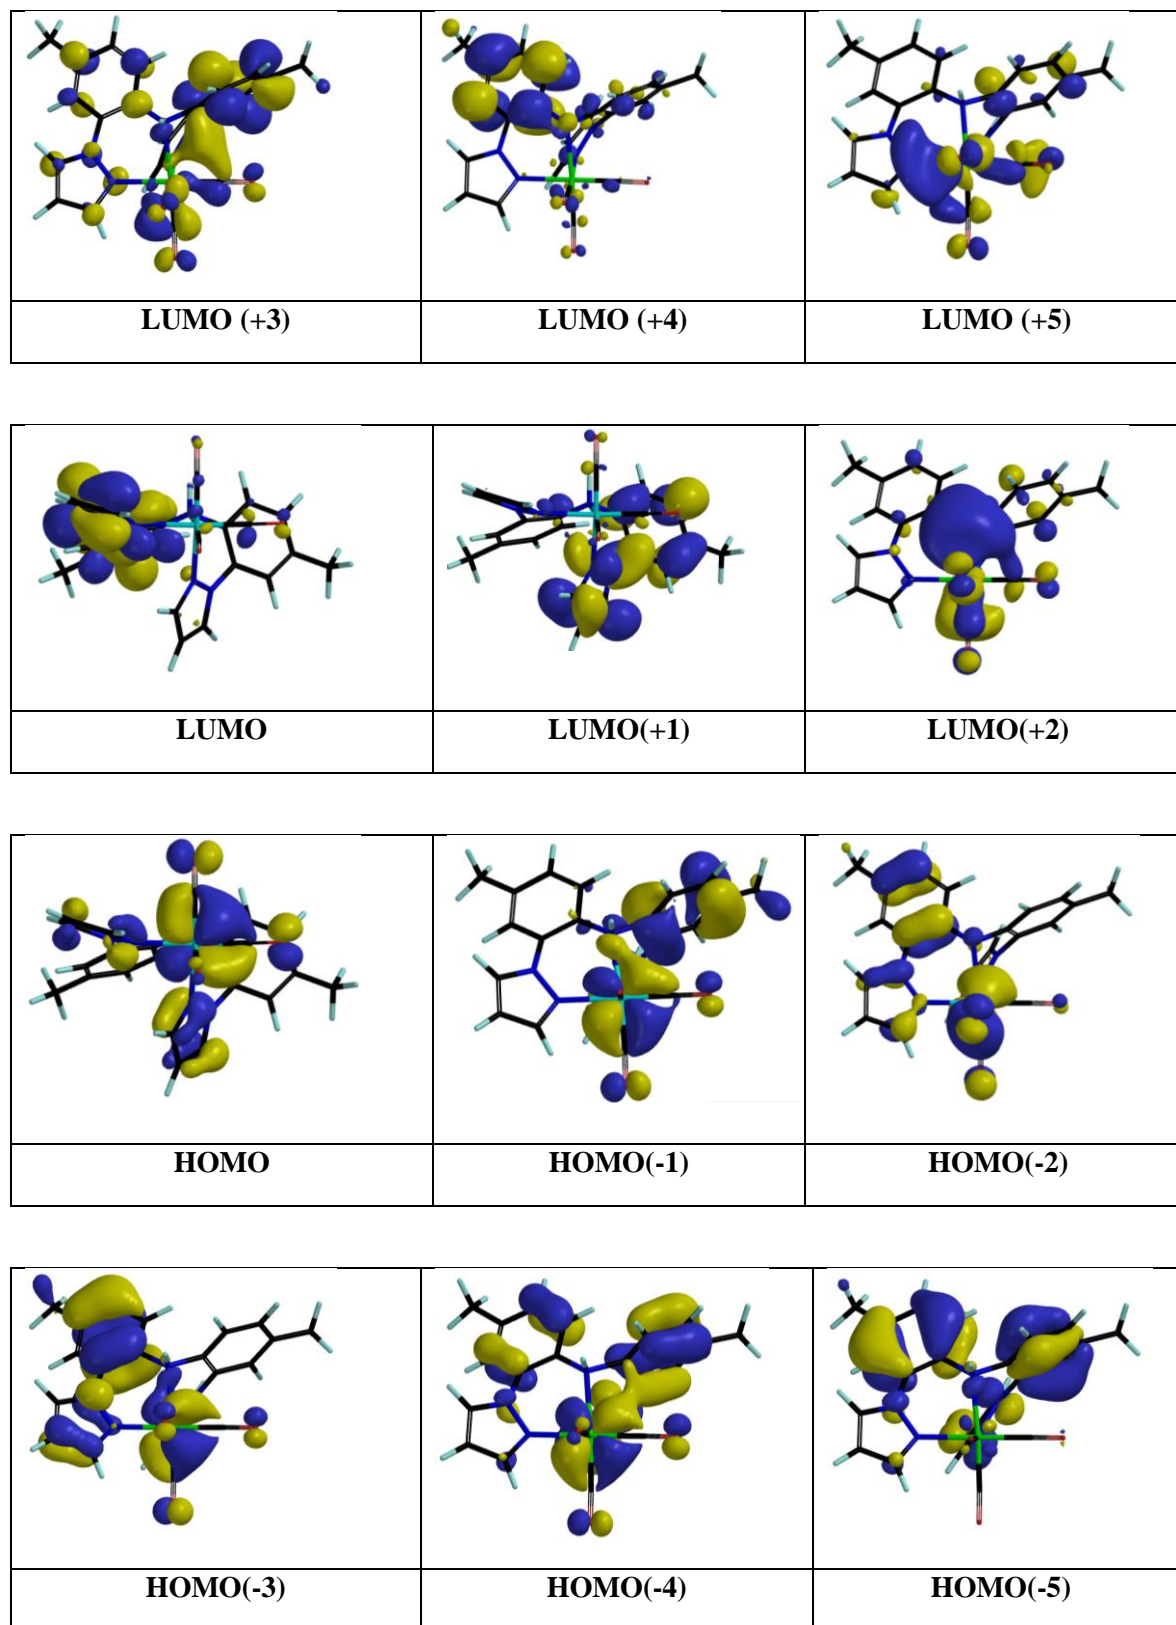

**Fig. S-19.** Frontier Orbitals for  $\text{Re}(\text{CO})_3(\text{L})$  (**3**) from DFT calculations (B3LYP/LACVP\*).

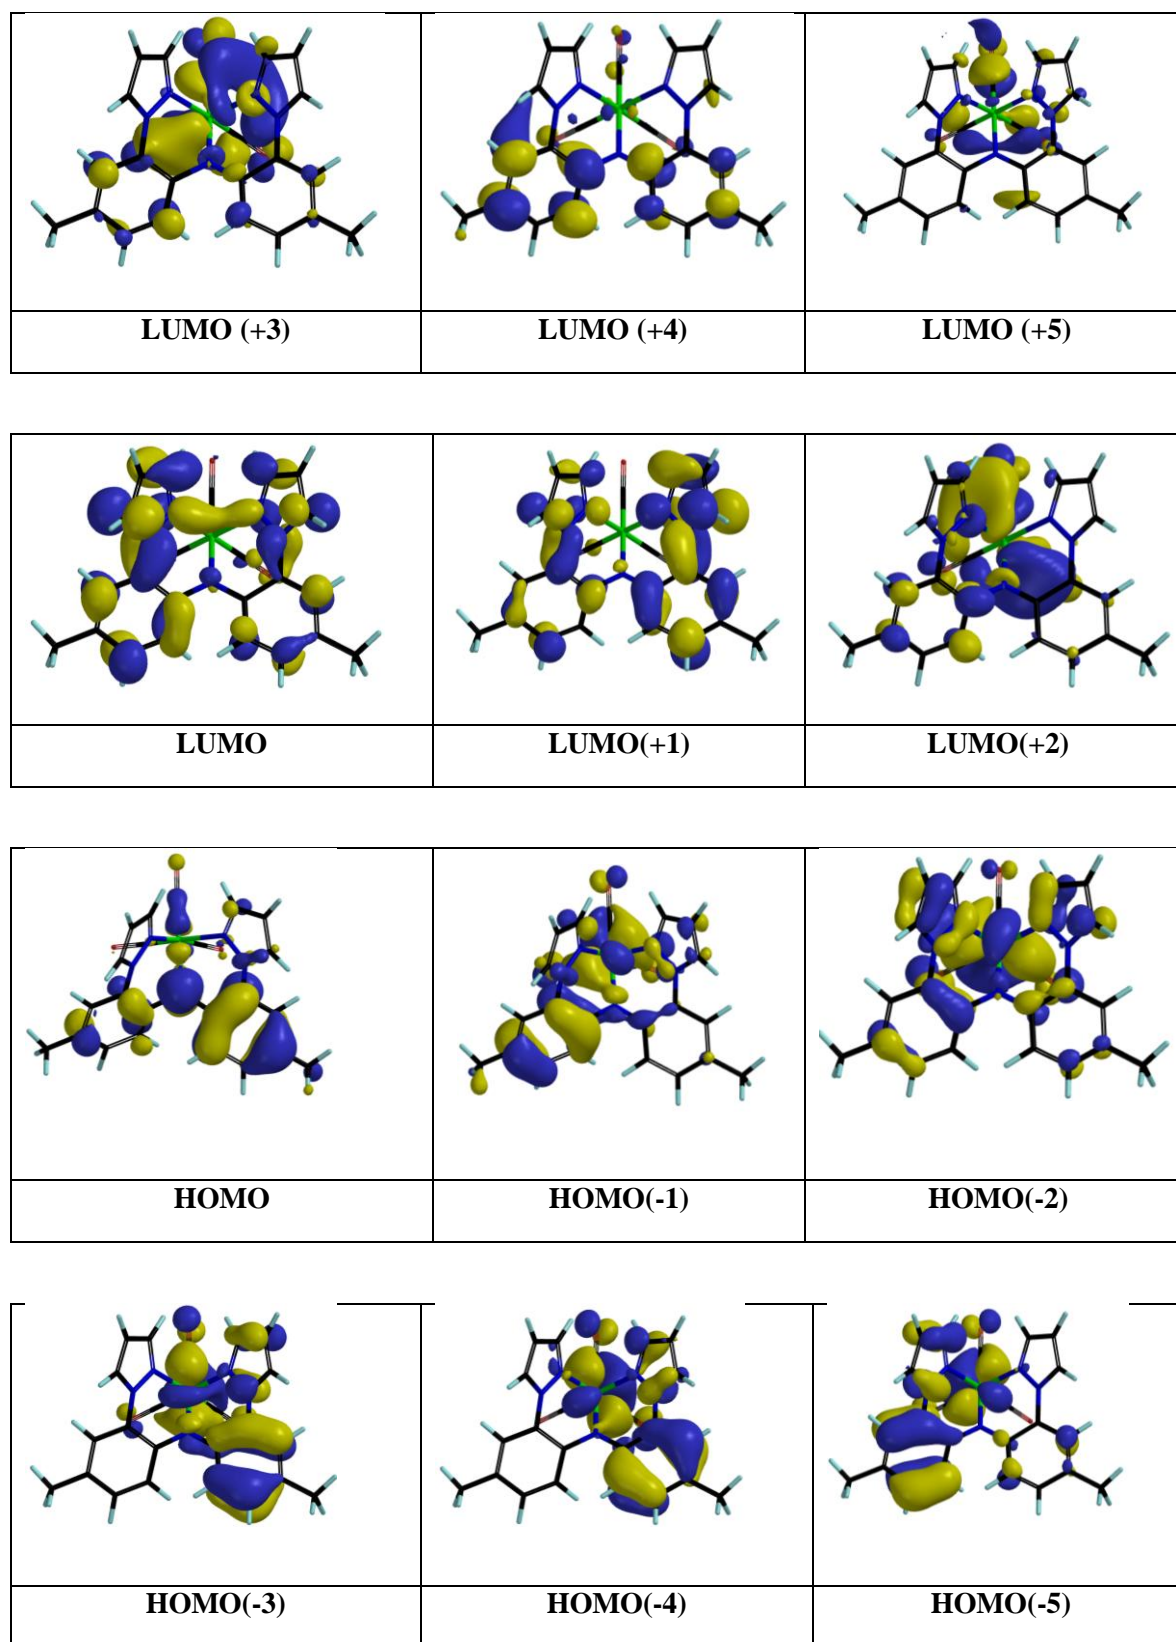

**Fig. S-20.** Alpha Spin Frontier Orbitals for  $[\text{Re}(\text{CO})_3(\text{L})]^+$  ( $3^+$ ) from DFT calculations (B3LYP/LACVP\*).

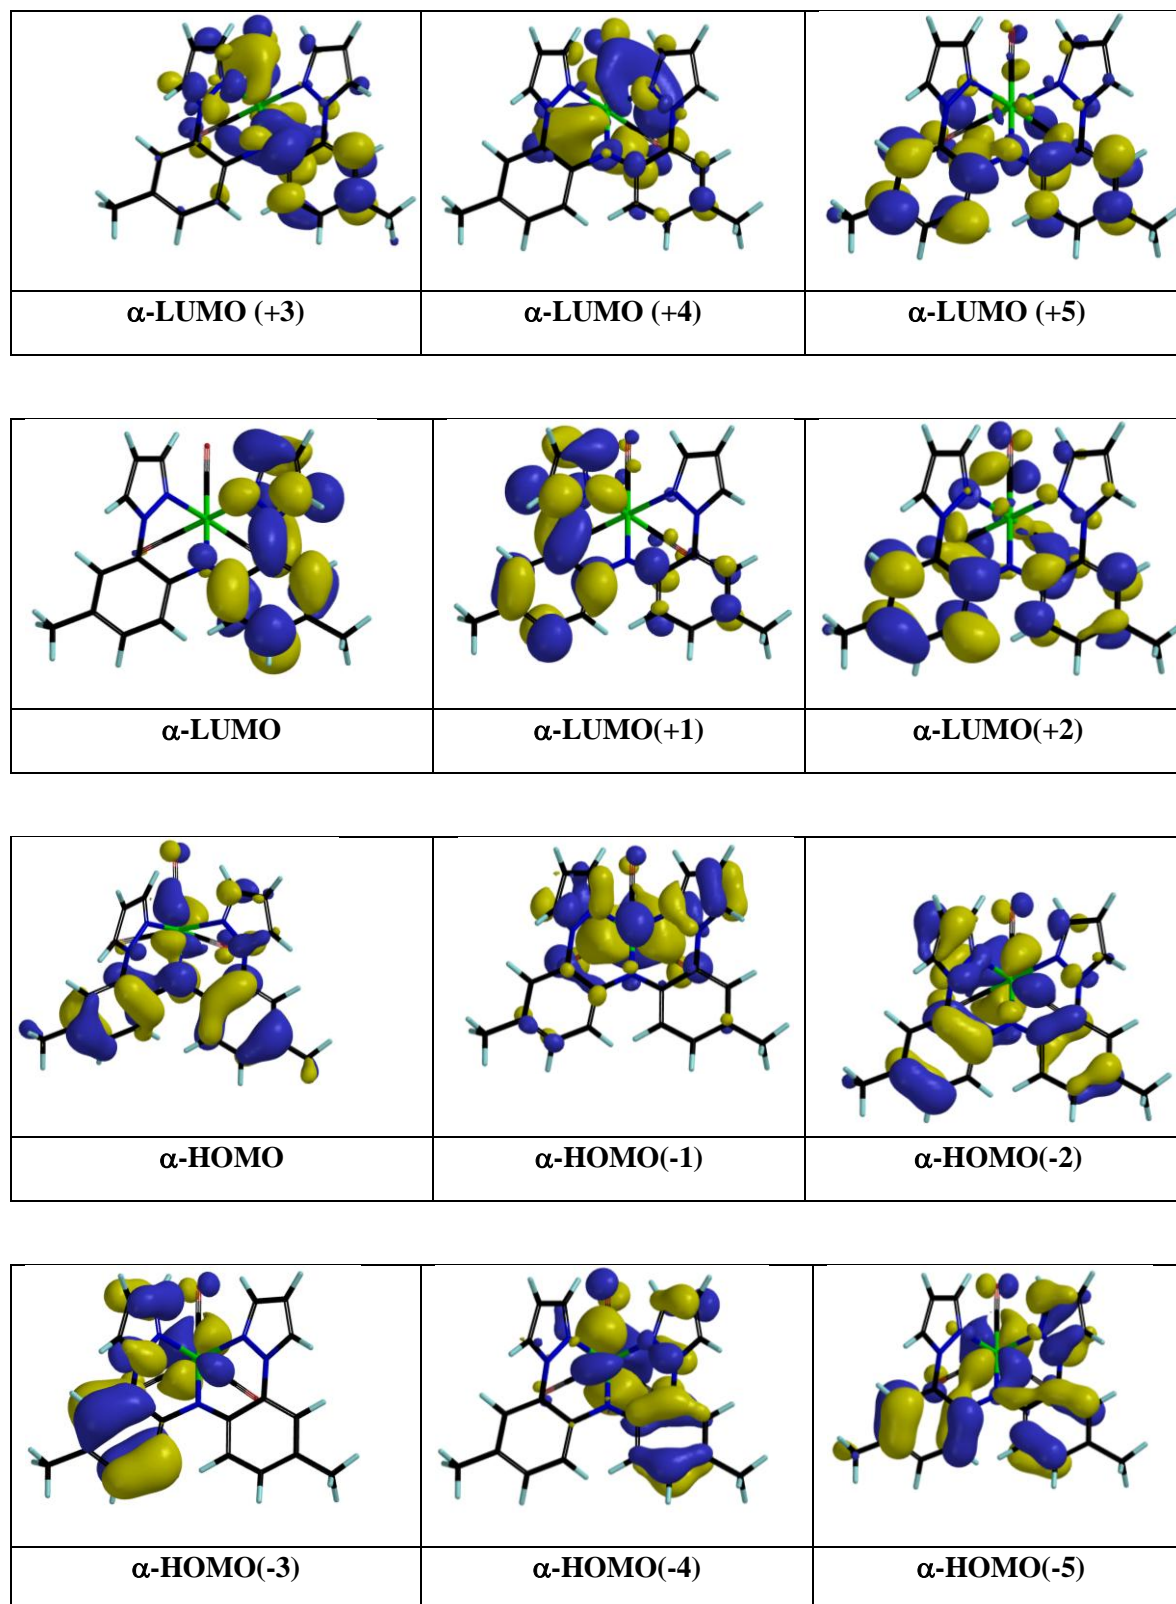

**Fig. S-21.** Beta Spin Frontier Orbitals for  $[\text{Re}(\text{CO})_3(\text{L})]^+$  ( $3^+$ ) from DFT calculations (B3LYP/LACVP\*).

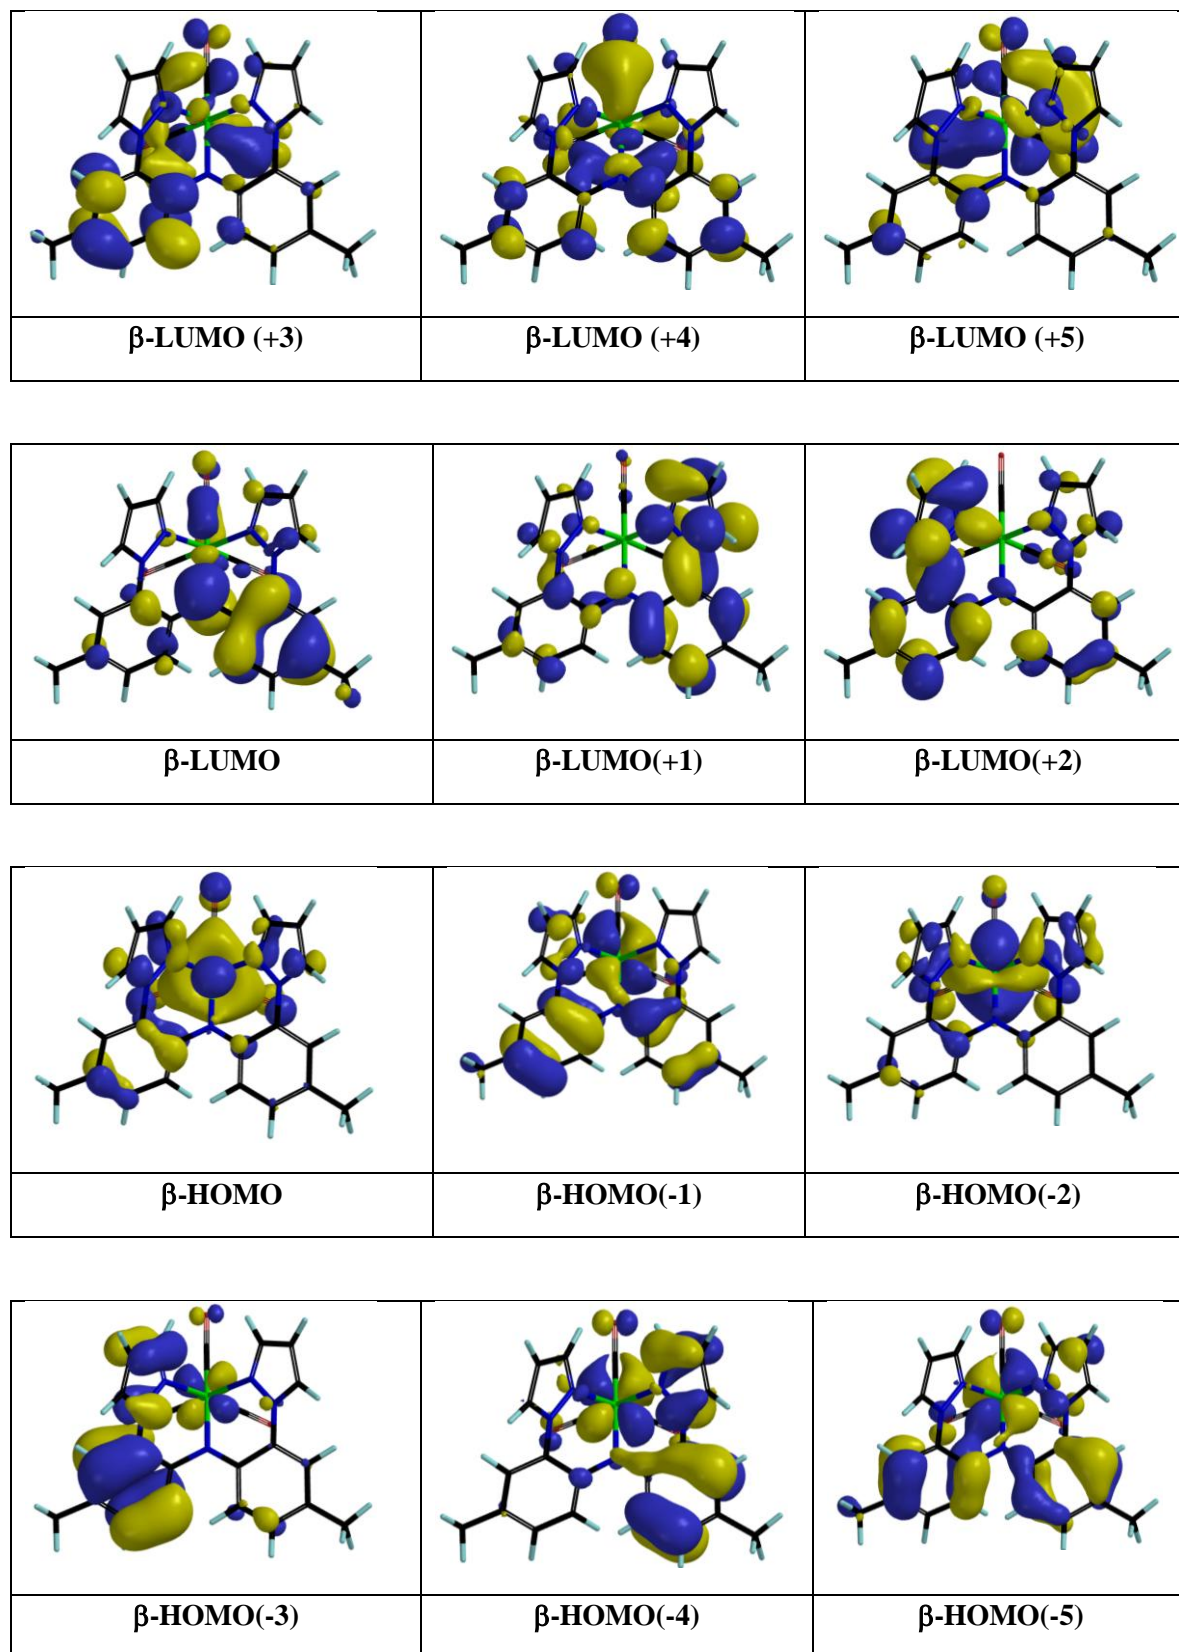

**Figure S-22.** Simulated electronic absorption spectra of **1**, **2<sup>+</sup>**, **3**, and **3<sup>+</sup>** fitted with Gaussian curves with full-width-at-half-maximum of 40 nm.

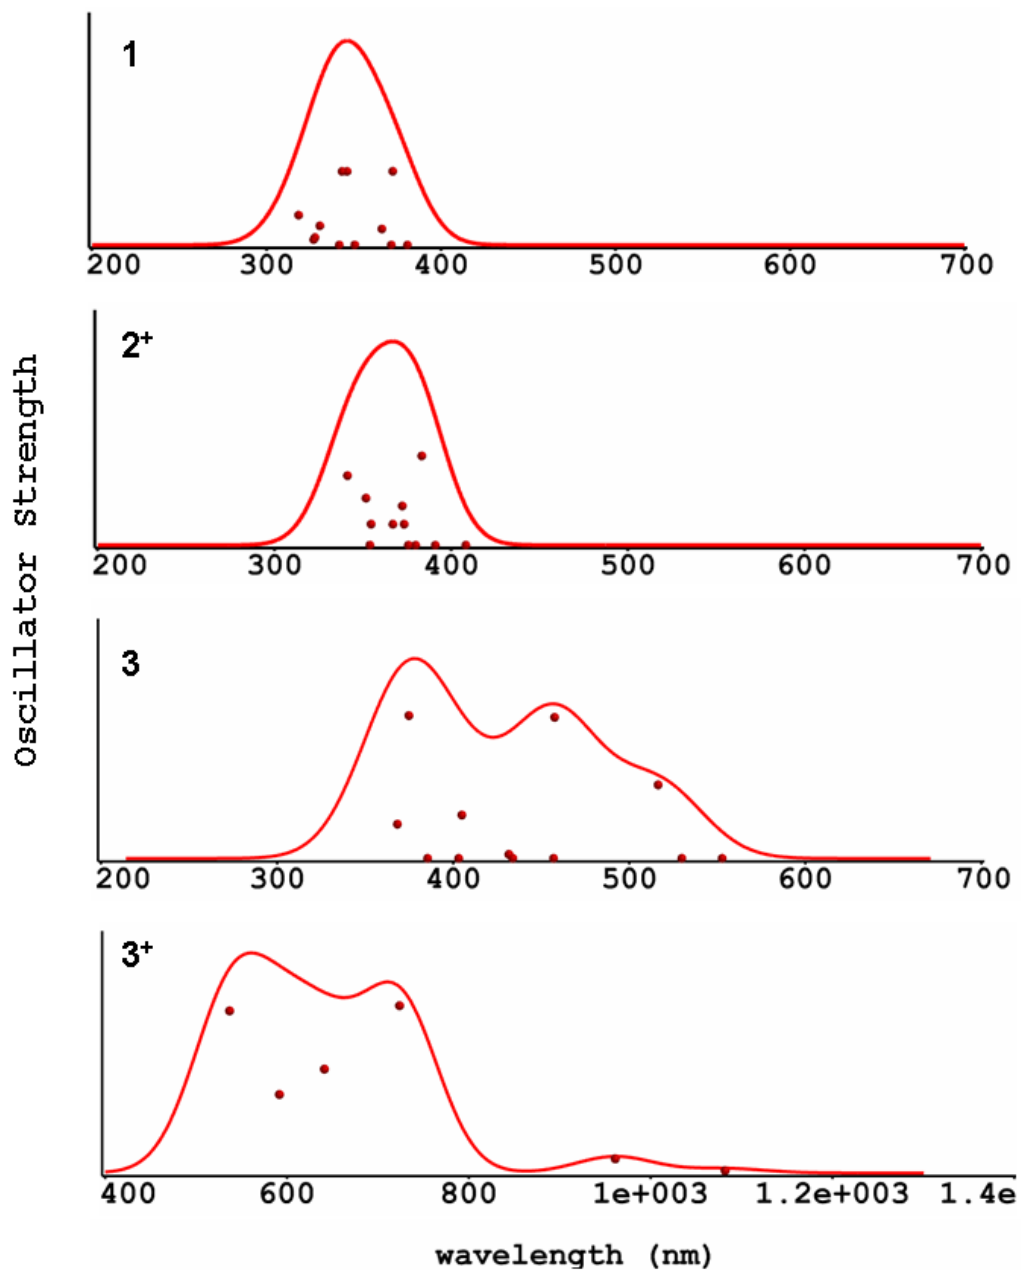

### TDDFT/TDA Excitation Energies for 1

**Excited state 1:** excitation energy (eV) = 3.2566  
Total energy for state 1: -1479.622018059532  
Multiplicity: Triplet  
Trans. Mom.: 0.0000 X 0.0000 Y 0.0000 Z  
Strength : 0.0000  
D(119) --> V( 1) amplitude = 0.9556

**Excited state 2:** excitation energy (eV) = 3.3301  
Total energy for state 2: -1479.619318640326  
Multiplicity: [Singlet](#)  
Trans. Mom.: 0.1484 X 0.2565 Y 0.1735 Z  
Strength : 0.0096  
D(119) --> V( 1) amplitude = 0.9896

**Excited state 3:** excitation energy (eV) = 3.3372  
Total energy for state 3: -1479.619058899995  
Multiplicity: Triplet  
Trans. Mom.: 0.0000 X 0.0000 Y 0.0000 Z  
Strength : 0.0000  
D(118) --> V( 1) amplitude = 0.9466

**Excited state 4:** excitation energy (eV) = 3.3868  
Total energy for state 4: -1479.617236331303  
Multiplicity: [Singlet](#)  
Trans. Mom.: -0.0257 X -0.0487 Y 0.1487 Z  
Strength : 0.0021  
D(118) --> V( 1) amplitude = 0.9903

**Excited state 5:** excitation energy (eV) = 3.5366  
Total energy for state 5: -1479.611728580531  
Multiplicity: Triplet  
Trans. Mom.: 0.0000 X 0.0000 Y 0.0000 Z  
Strength : 0.0000  
D(118) --> V( 3) amplitude = -0.3066  
D(118) --> V( 4) amplitude = 0.2180  
D(119) --> V( 3) amplitude = 0.5487  
D(119) --> V( 4) amplitude = -0.4354  
D(119) --> V( 5) amplitude = -0.2929  
D(119) --> V( 6) amplitude = 0.2462

**Excited state 6:** excitation energy (eV) = 3.5811  
Total energy for state 6: -1479.610093180668  
Multiplicity: Triplet  
Trans. Mom.: 0.0000 X 0.0021 Y 0.0000 Z  
Strength : 0.0096  
D(111) --> V( 1) amplitude = -0.3308  
D(114) --> V( 1) amplitude = 0.3991  
D(115) --> V( 1) amplitude = 0.2687  
D(116) --> V( 1) amplitude = 0.4482  
D(117) --> V( 1) amplitude = 0.3440

**Key: D(115) = HOMO, V(1) = LUMO  
D(114) = HOMO(-1), V(2) = L(+1); etc.**

**Excited state 7:** excitation energy (eV) = 3.6113  
Total energy for state 7: -1479.608983753050  
Multiplicity: Triplet  
Trans. Mom.: 0.0096 X 0.0000 Y 0.0000 Z  
Strength : 0.0096  
D(118) --> V( 3) amplitude = 0.6006  
D(118) --> V( 4) amplitude = -0.2998  
D(118) --> V( 5) amplitude = -0.4026  
D(119) --> V( 3) amplitude = 0.3342

**Excited state 8:** excitation energy (eV) = 3.6282  
Total energy for state 8: -1479.608364006247  
Multiplicity: Triplet  
Trans. Mom.: 0.0000 X 0.0000 Y 0.0000 Z  
Strength : 0.0000  
D(114) --> V( 2) amplitude = -0.3266  
D(116) --> V( 2) amplitude = 0.5812  
D(117) --> V( 2) amplitude = 0.2961  
D(118) --> V( 2) amplitude = 0.2227

**Excited state 9:** excitation energy (eV) = 3.7502  
Total energy for state 9: -1479.603879107580  
Multiplicity: [Singlet](#)  
Trans. Mom.: -0.0779 X 0.0099 Y 0.1454 Z  
Strength : 0.0025  
D(119) --> V( 2) amplitude = 0.7575  
D(119) --> V( 3) amplitude = -0.4618  
D(119) --> V( 4) amplitude = 0.2907

**Excited state 10:** excit. energy (eV) = 3.7823  
Total energy for state 10: -1479.602701674650  
Multiplicity: [Singlet](#)  
Trans. Mom.: -0.1013 X 0.0130 Y -0.0128 Z  
Strength : 0.0010  
D(119) --> V( 2) amplitude = 0.6030  
D(119) --> V( 3) amplitude = 0.6577  
D(119) --> V( 4) amplitude = -0.2617  
D(119) --> V( 5) amplitude = -0.2688

**Excited state 11:** excit. energy (eV) = 3.7916  
Total energy for state 11: -1479.602357313963  
Multiplicity: [Singlet](#)  
Trans. Mom.: 0.0301 X 0.0180 Y -0.0796 Z  
Strength : 0.0007  
D(118) --> V( 2) amplitude = 0.9253  
D(118) --> V( 4) amplitude = 0.2326

**Excited state 12:** excit. energy (eV) = 3.8940  
Total energy for state 12: -1479.598596977632  
Multiplicity: [Singlet](#)  
Trans. Mom.: 0.0066 X -0.1926 Y 0.0605 Z  
Strength : 0.0039  
D(118) --> V( 2) amplitude = 0.3097  
D(118) --> V( 3) amplitude = 0.7089  
D(118) --> V( 4) amplitude = -0.4187

## TDDFT/TDA Excitation Energies for 2

**Excited state 1:** excitation energy (eV) = 3.0361  
Total energy for state 1: -1466.353429882337  
Multiplicity: Triplet  
Trans. Mom.: 0.0000 X 0.0000 Y 0.0000 Z  
Strength : 0.0000  
D(115) --> V( 1) amplitude = 0.9872

**Excited state 2:** excitation energy (eV) = 3.1701  
Total energy for state 2: -1466.348505355361  
Multiplicity: Triplet  
Trans. Mom.: 0.0000 X 0.0000 Y 0.0000 Z  
Strength : 0.0000  
D(115) --> V( 2) amplitude = 0.9768

**Excited state 3:** excitation energy (eV) = 3.2342  
Total energy for state 3: -1466.346152520360  
Multiplicity: [Singlet](#)  
Trans. Mom.: 0.4473 X 0.3013 Y -0.1558 Z  
Strength : 0.0250  
D(115) --> V( 1) amplitude = 0.9427  
D(115) --> V( 2) amplitude = 0.2445

**Excited state 4:** excitation energy (eV) = 3.2628  
Total energy for state 4: -1466.345098410478  
Multiplicity: Triplet  
Trans. Mom.: 0.0000 X 0.0000 Y 0.0000 Z  
Strength : 0.0000  
D(114) --> V( 1) amplitude = 0.6663  
D(114) --> V( 2) amplitude = 0.6822

**Excited state 5:** excitation energy (eV) = 3.2991  
Total energy for state 5: -1466.343764711871  
Multiplicity: Triplet  
Trans. Mom.: 0.0250 X 0.0000 Y 0.0000 Z  
Strength : 0.0000  
D(114) --> V( 1) amplitude = 0.7391  
D(114) --> V( 2) amplitude = -0.6300

**Excited state 6:** excitation energy (eV) = 3.3204  
Total energy for state 6: -1466.342984703722  
Multiplicity: [Singlet](#)  
Trans. Mom.: -0.1553 X 0.1778 Y 0.1271 Z  
Strength : 0.0058  
D(113) --> V( 1) amplitude = 0.2170  
D(114) --> V( 1) amplitude = -0.5361  
D(115) --> V( 2) amplitude = 0.7828

**Key:** D(115) = HOMO, V(1) = LUMO  
D(114) = HOMO(-1), V(2) = L(+1); etc.

**Excited state 7:** excitation energy (eV) = 3.3299  
Total energy for state 7: -1466.342634951297  
Multiplicity: [Singlet](#)  
Trans. Mom.: -0.3451 X 0.0899 Y 0.0839 Z  
Strength : 0.0109  
D(114) --> V( 1) amplitude = 0.8302  
D(115) --> V( 2) amplitude = 0.4708

**Excited state 8:** excitation energy (eV) = 3.3778  
Total energy for state 8: -1466.340873967388  
Multiplicity: Triplet  
Trans. Mom.: 0.0109 X 0.0058 Y 0.0000 Z  
Strength : 0.0058  
D(112) --> V( 1) amplitude = 0.3153  
D(113) --> V( 1) amplitude = 0.8943

**Excited state 9:** excitation energy (eV) = 3.4955  
Total energy for state 9: -1466.336549137390  
Multiplicity: [Singlet](#)  
Trans. Mom.: 0.2379 X 0.0836 Y -0.0727 Z  
Strength : 0.0059  
D(113) --> V( 1) amplitude = 0.7007  
D(114) --> V( 2) amplitude = 0.6488

**Excited state 10:** excitation energy (eV) = 3.5018  
Total energy for state 10: -1466.336315114806  
Multiplicity: Triplet  
Trans. Mom.: 0.0000 X 0.0000 Y 0.0000 Z  
Strength : 0.0000  
D(111) --> V( 1) amplitude = 0.2770  
D(112) --> V( 1) amplitude = -0.5215  
D(113) --> V( 1) amplitude = 0.3122  
D(113) --> V( 2) amplitude = 0.6615

**Excited state 11:** excitation energy (eV) = 3.5240  
Total energy for state 11: -1466.335502452611  
Multiplicity: [Singlet](#)  
Trans. Mom.: 0.3531 X -0.1666 Y 0.0113 Z  
Strength : 0.0132  
D(113) --> V( 1) amplitude = 0.6017  
D(113) --> V( 2) amplitude = -0.4123  
D(114) --> V( 2) amplitude = -0.6004

**Excited state 12:** excitation energy (eV) = 3.6325  
Total energy for state 12: -1466.331514831832  
Multiplicity: [Singlet](#)  
Trans. Mom.: 0.0767 X -0.4484 Y -0.1075 Z  
Strength : 0.0194  
D(113) --> V( 2) amplitude = 0.8711  
D(114) --> V( 2) amplitude = -0.3270

-----

### TDDFT/TDA Excitation Energies for 3

**Excited state 1:** excitation energy (eV) = 2.2431  
Total energy for state 1: -1465.352989987785  
Multiplicity: Triplet  
Trans. Mom.: 0.0000 X 0.0000 Y 0.0000 Z  
Strength : 0.0000  
D(115) --> V( 1) amplitude = 0.9899

**Excited state 2:** excitation energy (eV) = 2.3402  
Total energy for state 2: -1465.349423764482  
Multiplicity: Triplet  
Trans. Mom.: 0.0000 X 0.0000 Y 0.0000 Z  
Strength : 0.0000  
D(115) --> V( 2) amplitude = 0.9872

**Excited state 3:** excitation energy (eV) = 2.4011  
Total energy for state 3: -1465.347184678253  
Multiplicity: [Singlet](#)  
Trans. Mom.: -0.6578 X 0.3729 Y 0.0944 Z  
Strength : 0.0342  
D(115) --> V( 1) amplitude = 0.9768

**Excited state 4:** excitation energy (eV) = 2.7098  
Total energy for state 4: -1465.335842155477  
Multiplicity: [Singlet](#)  
Trans. Mom.: -0.6957 X -0.6940 Y -0.1474 Z  
Strength : 0.0655  
D(115) --> V( 2) amplitude = 0.9415

**Excited state 5:** excitation energy (eV) = 2.7131  
Total energy for state 5: -1465.335720453897  
Multiplicity: Triplet  
Trans. Mom.: 0.0000 X 0.0000 Y 0.0000 Z  
Strength : 0.0000  
D(115) --> V( 3) amplitude = 0.9939

**Excited state 6:** excitation energy (eV) = 2.8580  
Total energy for state 6: -1465.330395849302  
Multiplicity: Triplet  
Trans. Mom.: 0.0342 X 0.0655 Y 0.0000 Z  
Strength : 0.0000  
D(115) --> V( 4) amplitude = 0.9818

**Excited state 7:** excitation energy (eV) = 2.8727  
Total energy for state 7: -1465.329852633203  
Multiplicity: [Singlet](#)  
Trans. Mom.: 0.0862 X 0.1373 Y 0.0023 Z  
Strength : 0.0018  
D(115) --> V( 3) amplitude = 0.9629

**Excited state 8:** excitation energy (eV) = 3.0622  
Total energy for state 8: -1465.322890670511  
Multiplicity: [Singlet](#)  
Trans. Mom.: -0.1074 X 0.5055 Y -0.0351 Z  
Strength : 0.0201  
D(115) --> V( 4) amplitude = 0.9233  
D(115) --> V( 5) amplitude = -0.2996

**Excited state 9:** excitation energy (eV) = 3.0756  
Total energy for state 9: -1465.322398022733  
Multiplicity: Triplet  
Trans. Mom.: 0.0018 X 0.0201 Y 0.0000 Z  
Strength : 0.0000  
D(115) --> V( 5) amplitude = 0.9686

**Excited state 10:** excitation energy (eV) = 3.2166  
Total energy for state 10: -1465.317216329854  
Multiplicity: Triplet  
Trans. Mom.: 0.0000 X 0.0000 Y 0.0000 Z  
Strength : 0.0000  
D(114) --> V( 1) amplitude = 0.9749

**Excited state 11:** excitation energy (eV) = 3.3077  
Total energy for state 11: -1465.313867583838  
Multiplicity: [Singlet](#)  
Trans. Mom.: -0.8913 X 0.1401 Y -0.0688 Z  
Strength : 0.0664  
D(115) --> V( 4) amplitude = 0.2753  
D(115) --> V( 5) amplitude = 0.8773

**Excited state 12:** excitation energy (eV) = 3.3664  
Total energy for state 12: -1465.311711006372  
Multiplicity: [Singlet](#)  
Trans. Mom.: -0.2016 X 0.1215 Y 0.3706 Z  
Strength : 0.0159  
D(112) --> V( 1) amplitude = 0.2309  
D(114) --> V( 1) amplitude = 0.9118

**Key: D(115) = HOMO, V(1) = LUMO  
D(114) = HOMO(-1), V(2) = L(+1); etc.**

### TDDFT/TDA Excitation Energies for 3<sup>+</sup>

Key: D(114) =  $\beta$ -HOMO, S(1) = SOMO  
D(113) =  $\beta$ -HOMO(-1) etc.

**Excited state 1:** excitation energy (eV) = 1.1461  
Total energy for state 1: -1465.681866755314  
<S\*\*2> : 0.7820  
Trans. Mom.: -0.0809 X 0.1636 Y 0.1911 Z  
Strength : 0.0020  
D(112) --> S( 1) amplitude = -0.1781 beta  
D(114) --> S( 1) amplitude = 0.9801 beta

**Excited state 2:** excitation energy (eV) = 1.2901  
Total energy for state 2: -1465.676572164976  
<S\*\*2> : 0.7809  
Trans. Mom.: -0.4551 X 0.1278 Y 0.0430 Z  
Strength : 0.0071  
D(113) --> S( 1) amplitude = 0.9862 beta

**Excited state 3:** excitation energy (eV) = 1.7128  
Total energy for state 3: -1465.661039338508  
<S\*\*2> : 0.7819  
Trans. Mom.: 0.3624 X 1.1215 Y 0.5938 Z  
Strength : 0.0731  
D(109) --> S( 1) amplitude = 0.1662 beta  
D(111) --> S( 1) amplitude = -0.2267 beta  
D(112) --> S( 1) amplitude = 0.9259 beta  
D(114) --> S( 1) amplitude = 0.1717 beta

**Excited state 4:** excitation energy (eV) = 1.9338  
Total energy for state 4: -1465.652918908972  
<S\*\*2> : 0.7870  
Trans. Mom.: 0.9637 X 0.1472 Y 0.1230 Z  
Strength : 0.0457  
D(110) --> S( 1) amplitude = -0.2854 beta  
D(111) --> S( 1) amplitude = 0.9185 beta  
D(112) --> S( 1) amplitude = 0.1875 beta

**Excited state 5:** excitation energy (eV) = 2.0953  
Total energy for state 5: -1465.646981941635  
<S\*\*2> : 0.7907  
Trans. Mom.: -0.0992 X 0.8173 Y -0.0029 Z  
Strength : 0.0348  
D(109) --> S( 1) amplitude = -0.2139 beta  
D(110) --> S( 1) amplitude = 0.9042 beta  
D(111) --> S( 1) amplitude = 0.2718 beta  
D(112) --> S( 1) amplitude = 0.1638 beta

**Excited state 6:** excitation energy (eV) = 2.3094  
Total energy for state 6: -1465.639114155231  
<S\*\*2> : 0.0020  
Trans. Mom.: -0.9738 X -0.5118 Y -0.2052 Z  
Strength : 0.0709  
D(109) --> S( 1) amplitude = 0.9367 beta  
D(110) --> S( 1) amplitude = 0.2490 beta

## References.

- [S1] S.P. Schmidt, W.C. Trogler, F. Basolo, *Inorg. Synth.* 1990, **28**, 160.
- [S2] L. Fan, B.M. Foxman, O.V. Ozerov, *Organometallics* 2004, **23**, 326.
- [S3] I. Noviandri, K.N. Brown, D.S. Fleming, P.T. Gulyas, P.A. Lay, A.F. Masters, L. Phillips, *J. Phys. Chem. B* 1999, **103**, 6713.
- [S4] R. Rathore, C.L. Burns, M.I. Deselimescu, S.E. Denmark, T. Bui, *Org. Synth.* 2005, **82**, 1.
- [S5] SMART APEX2 Version 2.0-2 Bruker Analytical X-ray Systems, Inc., Madison, Wisconsin, USA, 2005.
- [S6] SAINT+ Version 7.23a and SADABS Version 2.05. TWINABS Bruker Analytical X-ray Systems, Inc., Madison, Wisconsin, USA, 2007.
- [S7] Sheldrick, G. M. SHELXTL Version 6.1; Bruker Analytical X-ray Systems, Inc., Madison, Wisconsin, USA, 2000.
- [S8] CCDC 759658, 759659, 759660, 759661, and 759662 contain the supplementary crystallographic data for **H(L)**, **1**, **2·PF<sub>6</sub>**, **2·OTf**, and **3**. These data can be obtained free of charge from The Cambridge Crystallographic Data Centre via [www.ccdc.cam.ac.uk/data\\_request/cif](http://www.ccdc.cam.ac.uk/data_request/cif).
- [S9] (a) B.J. Liddle, S. Waniarachchi, S.V. Lindeman, J.R. Gardinier, *J. Organomet.. Chem.* 2010, **695**, 53. (b) L. Wei, J. Babich, W.C. Eckelman, and J. Zubieta *Inorg. Chem.*, **2005**, *44*, 2198. (c) B. Machura, R. Kruszynski, M. Jaworska, P. Lodowski, R. Penczek, J. Kusz, *Polyhedron* 2008, **27**, 1767. (c) R.M. Silva, B.J. Liddle, S.V. Lindeman, M.D. Smith, J.R. Gardinier, *Inorg. Chem.* 2006, **45**, 6794.
- [S10] SPARTAN, Wavefunction, Inc., Irvine, CA, 1997.

- [S11] For instance see: (a) Ref S-9a. (b) T. Takatani, J. S. Sears, D. C. Sherill, *J. Phys. Chem. A* 2009, **113**, 9231. (c) V.M. Rayon, G. Frenking, *Chem. Eur. J.* 2002, **8**, 4693. (d) R.K. Szilagyi, G. Frenking, *Organometallics* 1997 **16**, 4807.
- [S12] A. D. Becke, *J. Chem. Phys.* 1993, **98**, 5648.
- [S13] C. Lee, W. Yang, R.G. Parr, *Phys. Rev. B* 1988, **37**, 785.
- [S14] (a) P. J. Hay, W.R. Wadt, *J. Chem. Phys.* 1985, **82**, 270. (b) W.R. Wadt, P.J. Hay, *J. Chem. Phys.* 1985, **82**, 284.
